# Enhancing Multiplex Genome Editing by Natural Transformation (MuGENT) via inactivation of ssDNA exonucleases

Triana N. Dalia<sup>1</sup>, Soo H. Yoon<sup>2</sup>, Elisa Galli<sup>3</sup>, Francois-Xavier Barre<sup>3</sup>, Christopher M. Waters<sup>2</sup>, and Ankur B. Dalia<sup>1,\*</sup>

<sup>1</sup>Department of Biology, Indiana University, Bloomington, IN USA. <sup>2</sup>Department of Microbiology and Molecular Genetics, Michigan State University, East Lansing, MI, USA.

<sup>3</sup>Institute for Integrative Biology of the Cell (I2BC), Université Paris-Saclay, CEA, CNRS, Université Paris Sud, Gif sur Yvette, France.

\*Author for correspondence – Ankur B. Dalia, [ankdalia@indiana.edu](mailto:ankdalia@indiana.edu)

## ABSTRACT

Recently, we described a method for multiplex genome editing by natural transformation (MuGENT). Mutant constructs for MuGENT require large arms of homology (>2000 bp) surrounding each genome edit, which necessitates laborious *in vitro* DNA splicing. In *Vibrio cholerae*, we uncover that this requirement is due to cytoplasmic ssDNA exonucleases, which inhibit natural transformation. In ssDNA exonuclease mutants, one arm of homology can be reduced to as little as 40 bp while still promoting integration of genome edits at rates of ~50% without selection *in cis*. Consequently, editing constructs are generated in a single PCR reaction where one homology arm is oligonucleotide encoded. To further enhance editing efficiencies, we also developed a strain for transient inactivation of the mismatch repair system. As a proof-of-concept, we used these advances to rapidly mutate 10 high-affinity binding sites for the nucleoid occlusion protein SlmA and generated a duodecuple mutant of 12 diguanylate cyclases in *V. cholerae*. Whole genome sequencing revealed little to no off-target mutations in these strains. Finally, we show that ssDNA exonucleases inhibit natural transformation in *Acinetobacter baylyi*. Thus, rational removal of ssDNA exonucleases may be broadly applicable for enhancing the efficacy and ease of MuGENT in diverse naturally transformable species.

## INTRODUCTION

Natural transformation is a conserved mechanism of horizontal gene transfer in diverse microbial species. In addition to promoting the exchange of DNA in nature, this process is exploited to make mutant strains in a lab setting. Also, we have recently described MuGENT, a method for multiplex mutagenesis in naturally transformable organisms (1). This method operates under the principle that a subpopulation of cells under competence inducing conditions displays high rates of natural transformation. During MuGENT, cells are incubated with two distinct types of products; one product is a selected marker (i.e. containing an Ab<sup>R</sup> cassette), which is used to isolate the transformable subpopulation, while the other product is an unselected marker to introduce a mutation (genome edit) of interest without requiring selection *in cis*. Upon selection of the selected marker, one can screen for cotransformation of the unselected marker. Under optimal conditions, cotransformation frequencies can be up to 50%. Furthermore, multiple unselected markers can be incubated with cells simultaneously during this process for multiplex mutagenesis.

One requirement for unselected markers during MuGENT is long arms of homology (>2kb) surrounding each genome edit, which are required for high rates of cotransformation. As a result, generating mutant constructs requires laborious *in vitro* splicing of PCR products for each genome edit, which is a major bottleneck for targeting multiple loci during MuGENT. DNA integration during natural transformation is carried out by RecA-mediated homologous recombination. Initiation of RecA-mediated recombination, however, does not require such long regions of homology (2), and theoretically, one long arm of homology should be sufficient to initiate recombination. Therefore, we hypothesized that other factors might necessitate the long arms of homology required for unselected products during MuGENT.

Transforming DNA (tDNA) enters the cytoplasm of naturally transformable species as ssDNA (3). Here, we identify that ssDNA exonucleases inhibit natural transformation in *Vibrio cholerae* and *Acinetobacter baylyi*, two naturally competent species. We exploit this observation to improve MuGENT and perform two proof-of-concept experiments to

demonstrate the utility of this method for dissecting complex biological systems and address questions that are impractical using a classical genetic approach.

## RESULTS

*The ssDNA exonucleases RecJ and ExoVII limit natural transformation in V. cholerae.*

It has previously been shown that high efficiency natural transformation in *V. cholerae* requires long arms of homology surrounding the mutation (1,4). To test this here, we compared rates of transformation using tDNA products containing 3kb arms of homology on each side of an antibiotic resistance marker (i.e. 3/3 kb) or a product where one arm of homology is reduced to just 80bp (i.e. 0.08/3 kb). Consistent with previous studies, we find that the transformation efficiency of the 0.08/3 kb product is ~100-fold lower than with the 3/3 kb product (**Fig. 1**). Because RecA should be able to initiate recombination of tDNA with a single long arm of homology, we hypothesized that the reduced rates of transformation observed for the 0.08/3 kb product may be due to DNA endo- or exonucleases that degrade tDNA subsequent to uptake.

One factor previously implicated in limiting natural transformation in *V. cholerae* is the extracellular / periplasmic endonuclease Dns (5). We tested the transformation efficiency of a *dns* mutant using the 3/3 kb and 0.08/3 kb products and found no difference relative to the wildtype (**Fig. S1**). Thus, this factor does not account for the relatively poor transformation efficiency of the 0.08/3 kb product. During natural transformation, tDNA translocated into the cytoplasm is single-stranded. Thus, we hypothesized that cytoplasmic ssDNA exonucleases may degrade tDNA after uptake. As a result, rates of transformation for the 0.08/3 kb would be reduced compared to a 3/3 kb marker since the former has less DNA on one homology arm to serve as a “buffer” for exonuclease degradation. This is consistent with previous work, which demonstrated that extending arms of homology with nonspecific sequences could increase rates of natural transformation (possibly by serving as a buffer for degradation) (4). To test this hypothesis further and identify the ssDNA exonucleases that may be responsible, we targeted the ssDNA exonucleases RecJ, ExoVII, ExoIX, and/or ExoI for inactivation. We found that inactivation of *recJ* and *exoVII* independently resulted in significantly increased rates of natural transformation with the

0.08/3 kb product (**Fig. 1**). Furthermore, in a *recJ* *exoVII* double mutant, the transformation efficiency for the 0.08/3 kb product was increased ~100-fold, which was similar to the efficiency of the wildtype with the 3/3 kb product (**Fig. 1**). Thus, RecJ and ExoVII both inhibit natural transformation likely by degrading cytoplasmic ssDNA following tDNA uptake. Consistent with RecA-mediated recombination, enhanced transformation efficiency in the *recJ* *exoVII* double mutant required homology on both sides of the mutation and at least one long arm of homology (**Fig. S2**).

*High efficiency cotransformation of ssDNA exonuclease mutants with single PCR mutant constructs.*

Above, we found that as long as there was one long arm of homology (3kb), the other arm of homology could be 80 bp on a selected marker to support high efficiency integration of tDNA. For a selected product (i.e. a product containing a selectable Ab<sup>R</sup> marker), this has limited utility since generating these mutant constructs still requires *in vitro* DNA splicing of the Ab<sup>R</sup> cassette to one arm of homology. This advance would be much more pertinent if similar arms of homology could be used on unselected products during MuGENT. Normally, to make 3/3 kb mutant constructs for defined deletions or point mutations, the mutation is engineered onto the oligonucleotides used to amplify the upstream and downstream region of homology. Then, *in vitro* splicing of these products generates the final mutant construct. If 80 bp of homology is sufficient in ssDNA exonuclease mutant backgrounds, however, this can be engineered onto the same oligonucleotide used to generate the mutation. This would allow for generation of mutant constructs with 0.08/3 kb homology in a single PCR reaction (**Fig. 2A**).

To determine if mutant constructs generated in a single PCR reaction could be used for MuGENT in ssDNA exonuclease backgrounds, we first tested integration of one unselected product (also called cotransformation). The unselected genome edits tested introduced a 50bp deletion, 100bp deletion, 500bp deletion, or a transversion nonsense point mutation into the *lacZ* coding sequence, which provided a simple readout for cotransformation on X-gal containing medium. Single unselected products were incubated with a competent population along with a selected marker that replaces the frame-shifted transposase

VC1807 with an Ab<sup>R</sup> marker. We found that cotransformation rates for all of the unselected products tested were either at or near the limit of detection in the wildtype strain background (**Fig. 2B**). In the *recJ* *exoVII* mutant, however, a 50bp deletion and a transversion point mutation could be integrated at cotransformation rates of ~50% (**Fig 2B**). The concentration of unselected product required for high rates of cotransformation are ~1000ng, which is ~3 times lower than that required in the original MuGENT protocol (**Fig. 2C**) (1). This is likely due to reduced degradation of cytoplasmic tDNA in the ssDNA exonuclease mutant background. We also sought to determine the shortest length of homology required to facilitate efficient cotransformation. To that end, we tested unselected products with reduced lengths of the “short” oligonucleotide encoded arm of homology. We found that a short arm of homology of even ~25 bp allowed for efficient cotransformation, however, the highest rates observed required ~40 bp of homology (**Fig. 2D**). Thus, cotransformation in ssDNA exonuclease mutant backgrounds allows for high efficiency integration of unselected products generated via a single PCR reaction without any *in vitro* DNA splicing.

#### *Subverting MMR in ssDNA exonuclease mutant backgrounds using a dominant negative allele of MutL.*

Single-stranded exonucleases, including RecJ and ExoVII, participate in mismatch repair (MMR) by excising and degrading the mutated strand (6). Thus, while a *recJ* *exoVII* double mutant may allow for highly efficient natural transformation, an off-target effect may be an increased rate of spontaneous mutations via reduced MMR activity. To test this, we performed fluctuation tests for spontaneous resistance to rifampicin to determine the mutation rates of select ssDNA exonuclease mutants. We found that the *recJ* *exoVII* double mutant had a mutation rate similar to the wildtype (**Fig. S3**), consistent with intact MMR activity in this mutant background.

Conversely, MMR can inhibit natural transformation in many bacterial species (3). We therefore tested if MMR inhibited natural transformation of point mutations in ssDNA exonuclease mutants using 0.04/3 kb mutant constructs. To induce transformation in these experiments, strains contained the master regulator of competence, *tfoX*, under the control

of an IPTG-inducible  $P_{tac}$  promoter (7). Generally, transition mutations are efficiently repaired by the MMR system, while transversion mutations are poorly recognized (8,9). Cotransformation of a transition point mutation into the parent *recJ exoVII* mutant is significantly reduced compared to a transversion point mutation (**Fig. 3A**). Conversely, both types of point mutations are integrated at equal rates in a  $\Delta mutS$  MMR-deficient background (**Fig. 3A**). Thus, these results indicate that MMR can inhibit the integration of point mutations in ssDNA exonuclease mutant backgrounds when using 0.04/3 kb mutant constructs.

While inactivation of MMR allowed for highly efficient integration of genome edits with point mutations, performing mutagenesis in MMR deficient backgrounds is not optimal, as these strains would accumulate a large number of off-target mutations. So next, we sought to generate a strain where we could transiently inactivate the MMR system. Recently, a dominant-negative allele of MutL (E32K) was used to transiently inactivate MMR during multiplex automated genome engineering (MAGE) in *Escherichia coli* (10). We generated a strain of *V. cholerae* where expression of *mutL* E32K was driven by an IPTG-inducible  $P_{tac}$  promoter in the  $\Delta recJ \Delta exoVII P_{tac-tfoX}$  mutant strain background. As expected, the spontaneous mutation rate of this strain was similar to the parent strain in the absence of IPTG, while it approached the mutation rate of an MMR-deficient mutant in the presence of 100  $\mu$ M IPTG (**Fig. 3B**), indicating that overexpression of *mutL* E32K, indeed, functionally inactivates the MMR system. Next, we tested the cotransformation efficiency of a genome edit with a transition point mutation into this transient mutator strain. In the  $P_{tac-mutL}$  E32K background, we observed remarkably high cotransformation efficiencies for a transition point mutation, which was equivalent to the cotransformation efficiency observed in an MMR deficient background (**Fig. 3C**). Cells only undergo 1-2 generations of growth in the presence of IPTG in these experiments (i.e. conditions where MMR is transiently inactivated); thus, the number of spontaneous mutations that will be introduced during this procedure should be minimal, which was tested further below.

*Exo-MuGENT for dissection of SlmA function in V. cholerae*

Having successfully introduced one unselected product into ssDNA exonuclease mutants using a 0.04/3 kb mutant construct, we next wanted to test MuGENT with multiple 0.04/3 kb unselected products in ssDNA exonuclease mutant backgrounds. We refer to this new approach as Exo-MuGENT. In a first proof-of-concept experiment, we used Exo-MuGENT to introduce multiple unselected products containing specific point mutations into the genome. As a target, we studied the nucleoid occlusion protein SlmA, which binds to specific sequences in the genome called SlmA binding sites (SBSs). DNA-binding by SlmA allows it to inhibit FtsZ polymerization over the nucleoid, which is required for proper placement of the division site in *V. cholerae* (11). Indeed, inactivation of *slmA* results in mislocalization of FtsZ during the cell cycle (11). There are 79 SBSs in the *V. cholerae* chromosome (11) with varying affinities for SlmA. We decided to initially determine the role of the highest-affinity SBSs on nucleoid occlusion activity. To test this, we performed Exo-MuGENT to mutate conserved residues in the 10 SBSs with the highest affinity for SlmA (11). The mutant constructs contained homology lengths of 0.04/3 kb, where the 40bp of homology was appended onto the same oligonucleotide used to introduce the point mutations into the SBSs. Using this approach, we first incubated 5 unselected products with a population of competent cells to target 5 distinct SBSs for mutagenesis. This was performed in both the parent strain background ( $\Delta recJ \Delta exoVII P_{tac-tfoX}$ ) and in the  $P_{tac-mutL}$  E32K transient mutator strain ( $\Delta recJ \Delta exoVII P_{tac-tfoX} P_{tac-mutL}$  E32K). Surprisingly, Exo-MuGENT yielded highly complex mutant populations in both strain backgrounds with a significant fraction (10-15%) of both populations containing 3-4 genome edits (**Fig. 4A**). Thus, while MMR may limit integration of unselected products with a single point mutation (**Fig. 3C**), Exo-MuGENT with multiple unselected products that introduce a large number of point mutations may overwhelm the MMR system. This phenomenon is also observed in other naturally competent species (12). Thus, depending on the application, both the parent and transient mutator strain backgrounds can be used to generate highly edited strain backgrounds and complex mutant populations.

Next, we took the strains with the greatest number of genome edits in the first cycle of Exo-MuGENT and then subjected each to additional cycles of editing. We selected the most highly edited strain at each cycle and continued until all 10 genome edits were

incorporated. This process took 3 cycles of Exo-MuGENT in the  $P_{tac}$ -*mutL* E32K strain background and 4 cycles in the parent strain background. We then repaired the *recJ*, *exoVII*,  $P_{tac}$ -*mutL* E32K, and  $P_{tac}$ -*tfoX* mutations in both strains backgrounds to generate SBS edited strains (referred to as  $\Delta$ 10xSBS) that were isogenic with our wild type strain (see Methods for details). Thus, these strains were subjected to 14 distinct genome edits by MuGENT in ssDNA exonuclease mutant backgrounds.

One concern when performing multiplex mutagenesis is the accumulation of off-target mutations. The original MuGENT protocol resulted in little to no off-target mutations, even in strains with 13 genome edits (1,13). To determine if this was also true for Exo-MuGENT, we sequenced the whole genomes of the  $\Delta$ 10xSBS strains obtained in the  $P_{tac}$ -*mutL* E32K and parent strain backgrounds (See Methods for details) and analyzed this data for the presence of off-target point mutations and/or small indels relative to the parent strain. For the  $\Delta$ 10xSBS mutant in the parent strain background, we identified two non-synonymous point mutations in the *alaS* and *rdgC* genes, which were not within the mutant constructs of any of the SBSs targeted by our approach. So, these were likely spontaneous point mutations in this strain. In the  $P_{tac}$ -*mutL* E32K strain background, despite transient suppression of mismatch repair during mutagenesis, we found no off-target mutations in the  $\Delta$ 10xSBS mutant. As a result, the latter strain was characterized further for its impact on cell division licensing.

First, we found that FtsZ localization throughout the cell cycle in the  $\Delta$ 10xSBS mutant was largely similar to the wildtype, indicating that these 10 high-affinity SBSs do not account for the majority of SlmA-dependent nucleoid occlusion activity (**Fig. S4**). Cell division accuracy can be assessed by measuring the faithful placement of the septum at midcell in dividing cells. In the  $\Delta$ 10xSBS mutant we did observe a small but significant reduction in cell division accuracy (**Fig. 4B and C**). Thus, these 10 SBSs may play a subtle role in the proper placement of the division site in *V. cholerae*. Cumulatively, these results demonstrate that Exo-MuGENT (i.e. the use of ssDNA exonuclease mutants for MuGENT with single PCR mutant constructs) dramatically simplifies the procedure and provides an



efficient means to rapidly generate highly edited bacterial genomes with little to no off-target mutations.

### *Exo-MuGENT for genetic dissection of c-di-GMP biogenesis in V. cholerae*

Next, we attempted to use Exo-MuGENT to introduce multiple deletions into the genome in a second proof-of-concept experiment. The targets in this second experiment are the genes required for biogenesis of cyclic di-GMP (c-di-GMP). This secondary messenger regulates the transition between motile and sessile lifestyles in microbial species and is generated by the action of diguanylate cyclases (DGCs) (14). There are 41 distinct DGCs in *V. cholerae* (15). Since c-di-GMP is readily diffusible, this compound can mediate a global regulatory response (low specificity signaling), however, it has been demonstrated in *V. cholerae* that specific DGCs mediate distinct outputs that are independent of the cellular c-di-GMP concentration (16). This argues a high-specificity of signaling via distinct DGCs. Also, with such a large number of DGCs there is the possibility that enzymes within this class are genetically redundant. To begin to genetically dissect this system, we decided to inactivate the 12 DGCs that are most highly expressed (as determined by RNA-seq) or that were previously implicated in c-di-GMP-dependent phenotypes during growth in rich medium (**Table S1**) (17,18). Genes were inactivated using mutant constructs that replaced 48 bp of the 5' end of each gene targeted with a premature stop codon. These mutant constructs had 0.04/3 kb of homology, where the 40 bp of homology was appended onto the oligonucleotide used to introduce the mutation. Thus, each unselected product was generated in a single PCR reaction as described above (**Fig. 2A**). We performed Exo-MuGENT in the *recJ*, *exoVII*, *P<sub>tac</sub>-tfoX* strain with 5 of these unselected products. In a single cycle, ~60% of the population had one or more genome edits with a small portion (~6%) of the population having 3-4 genome edits incorporated in a single step (**Fig. 5A**). The quadruple mutant generated in the first cycle of this process was subjected to three additional rounds of MuGENT with the most highly edited strain at each step being carried over into the subsequent cycle until all 12 of the DGCs targeted were inactivated (**Fig. 5B**). Then, we repaired the *recJ*, *exoVII*, *P<sub>tac</sub>-tfoX*, and *lacZ::lacIq* mutations in this background to make a strain that was isogenic with the wildtype. Despite the 16 genetic modifications, whole genome sequencing revealed that this strain had no off-target mutations.

In *V. cholerae*, c-di-GMP is produced at higher levels during growth at low cell density (LCD) compared to high cell density (HCD) (19). We found that c-di-GMP levels were at the limit of detection in cell extracts of the  $\Delta 12$  DGC mutant at both LCD and HCD as measured by liquid chromatography coupled with tandem mass spectrometry (LC-MS/MS), indicating that the 12 DGCs targeted play a major role in producing this second messenger during growth in rich medium (**Fig. 5C**). Note that the limit of detection at LCD is different from that at HCD in these assays (see Methods for details). Low levels of c-di-GMP are correlated with enhanced motility and decreased biofilm formation in *V. cholerae* (20). Consistent with this, we find that the  $\Delta 12$  DGC strain displays significantly increased motility on swim agar (**Fig. 5D**). The E7946 strain used throughout this study is a smooth variant of *V. cholerae* and naturally produces poor biofilms. Therefore, we did not observe a decrease in biofilm formation in the WT compared with the  $\Delta 12$  DGC strain. However, one transcriptional activator required for extracellular polysaccharide production and biofilm formation is VpsR (21). To activate transcription, VpsR directly binds to c-di-GMP (22). We found that ectopic expression of VpsR in the wildtype background resulted in a significant increase in biofilm formation, presumably by enhancing the activity of the basal levels of c-di-GMP produced (**Fig. 5E**). VpsR is not, however, sufficient and c-di-GMP is still required for activation of downstream pathways required for biofilm formation (22,23). Consistent with this, we find that VpsR overexpression in the  $\Delta 12$  DGC strain does not increase biofilm formation (**Fig. 5E**). Thus, this suggests that some combination of the 12 DGCs targeted generate the c-di-GMP required for VpsR-dependent biofilm formation in rich medium.

The phenotype of the  $\Delta 12$  DGC mutant on swim agar was more severe than any single DGC mutant strain, suggesting that the 12 DGCs targeted work in concert to additively or synergistically decrease motility (**Fig. S5**). Indeed, redundancy amongst DGCs has been previously reported (17,18). C-di-GMP is degraded by phosphodiesterases (PDE), thus in PDE mutant strains, one would expect elevated levels of c-di-GMP. It was previously shown that inactivation of the PDE *cdgJ* dramatically reduces swimming motility as a result of elevated c-di-GMP-mediated mannose-sensitive hemagglutinin pilus (MSHA) activity

(17,24). Inactivation of 4 DGCs in the *cdgJ* mutant resulted in increased swimming motility (due to reducing c-di-GMP levels), however, the swimming motility observed was still significantly lower than an isogenic strain where the 4 DGCs were inactivated in an otherwise wildtype background (17). This suggested that additional DGCs (other than the 4 targeted) might still be generating c-di-GMP, which results in reduced motility in the *cdgJ* mutant background. Consistent with prior work, the *cdgJ* mutant in a wildtype background resulted in a significantly decreased swim radius in our hands (**Fig. 5F**). In the  $\Delta 12$  DGC strain background, however, swimming was unaffected by inactivation of *cdgJ* (**Fig. 5F**). Cumulatively, these results indicate that these 12 DGCs are primarily responsible for production of c-di-GMP in rich medium to promote both swimming motility and biofilm formation in *V. cholerae*.

#### *Natural transformation in Acinetobacter baylyi is also inhibited by cytoplasmic ssDNA exonucleases*

Another highly naturally competent Gram-negative organism is *Acinetobacter baylyi*. It was previously shown that the ssDNA exonuclease RecJ limits integration of tDNA by homology-facilitated illegitimate recombination (HFIR), but not by truly homologous recombination during natural transformation (25). Homologous recombination, however, was tested in that study by using mutant constructs containing long regions of homology on both sides of the mutation. Indeed, we also find little impact of the ssDNA exonucleases RecJ and ExoX when using tDNA containing long arms of homology (3/3 kb)(**Fig. 6**). If we use tDNA that contains one short arm of homology (0.08/3 kb), however, we find that *recJ exoX* double mutants are significantly more transformable than the parent strain (**Fig. 6**). This result suggests that ssDNA exonucleases inhibit natural transformation in *A. baylyi* as observed in *V. cholerae*. Thus, rational removal of ssDNA exonucleases may be a viable approach to enhance the efficiency and ease of MuGENT in diverse naturally competent microbial species.

## DISCUSSION

In this study we uncover that cytoplasmic ssDNA exonucleases degrade tDNA to inhibit natural transformation in *V. cholerae* and *A. baylyi*. Through systematic genetic dissection

of ssDNA exonucleases in *V. cholerae* we identified that RecJ and ExoVII are likely the main inhibitors of this process. In a *recJ* *exoVII* double mutant, we found that one arm of homology can be reduced to as little as 25 bp and still support high rates of natural transformation. We further exploited this discovery to perform MuGENT in ssDNA exonuclease mutants using mutant constructs that are generated in a single PCR reaction, an advance we have termed Exo-MuGENT. This improvement greatly simplifies the procedure and enhances the scalability of MuGENT in *V. cholerae* to promote generation of highly edited bacterial genomes on even faster timescales. In *A. baylyi* we also found that ssDNA exonucleases could inhibit natural transformation. However, rates of transformation with the 0.08/3 kb product in the *recJ* *exoX* mutant were still lower than when using the 3/3 kb product (**Fig. 6**). This suggests that other factors (additional ssDNA exonucleases, the MMR system, DNA endonucleases, etc.) may still prevent high efficiency integration of tDNA in *A. baylyi*. Identifying and characterizing these factors will be the focus of future work.

We performed two proof-of-concept experiments to demonstrate the utility and speed of Exo-MuGENT in *V. cholerae*. First, we mutated 10 high-affinity binding sites for the nucleoid occlusion protein SlmA. This analysis uncovered that these 10 binding sites play a small, yet significant role in accurate cell division. Further mutagenesis of the remaining 69 SBSs may uncover which binding sites are critical for SlmA-dependent nucleoid occlusion. Furthermore, a strain lacking all SBSs would allow for testing which SBSs (or genomic positions) are sufficient to promote nucleoid occlusion, which will be the focus of future work. This experiment also provides a framework for assessing the function of additional DNA binding proteins (e.g. transcription factors, chromosomal macrodomain proteins, partitioning systems, etc.). Using Exo-MuGENT to mutagenize DNA binding sites can rapidly uncover which genetic loci are critical for a particular phenotype. Also, Exo-MuGENT could be used to introduce novel binding sites at disparate genetic loci to determine the role of chromosomal positioning on gene function.

In our second proof-of-concept experiment, we used Exo-MuGENT to inactivate the 12 DGCs that were mostly highly expressed and/or active during growth in rich medium. This

resulted in a strain that produced no detectable c-di-GMP. Consistent with this, we find that even when the phosphodiesterase *cdgJ* is inactivated, the  $\Delta 12$  DGC strain does not display reduced motility, a c-di-GMP dependent phenotype. As a result, we believe this mutant represents a genetic background with the lowest c-di-GMP levels observed in *V. cholerae*. Future work will focus on defining if any of the 12 DGCs studied here are independently sufficient to promote biofilm formation and reduce motility and/or if there are genetic interactions between these genes. Also, we will use Exo-MuGENT to systematically genetically dissect each of the 41 DGCs in *V. cholerae* as well as the 30 genes involved in degradation of this secondary messenger by first making a strain of *V. cholerae* that lacks all of these genes. This analysis could uncover genetic interactions among these loci as well as novel roles for c-di-GMP in *V. cholerae* biology.

Exo-MuGENT adds to the continually developing toolbox of methods for synthetic biology in microbial systems. One major advantage of MuGENT over other methods for multiplex genome editing is the ability to introduce both small and sizable genome edits. The size of genome edits that can be incorporated at high-efficiency by Exo-MuGENT while sizable (~50 bp), are significantly less than what was possible with the original MuGENT method (~500-1000 bp genome edits at similar efficiencies). This can still allow for promoter swaps, RBS tuning, gene inactivation, etc. For most applications, the substantial benefit of easily generated mutant constructs (as discussed above) can be a worthwhile tradeoff. MuGENT has now been demonstrated in diverse species including *V. cholerae* (1), *Vibrio natriegens* (26), *Streptococcus pneumoniae* (1), *Helicobacter pylori* (27) and *A. baylyi* (our unpublished results). Thus, Exo-MuGENT may be a viable approach in many of these and possibly other naturally competent organisms.

## **METHODS**

### *Bacterial strains and culture conditions*

All strains used throughout this study are derived from *V. cholerae* E7946 (28) or *A. baylyi* ADP1 (29). *V. cholerae* strains were routinely grown in LB broth and on LB agar plates supplemented with 50  $\mu\text{g}/\text{mL}$  kanamycin, 200  $\mu\text{g}/\text{mL}$  spectinomycin, 10  $\mu\text{g}/\text{mL}$

trimethoprim, 100 µg/mL carbenicillin, and 100 µg/mL streptomycin as appropriate. *A. baylyi* was routinely grown in LB broth and on LB agar plates supplemented with 50 µg/mL kanamycin or 50 µg/mL spectinomycin as appropriate. A detailed list of all strains used throughout this study can be found in **Table S2**.

#### *Generation of mutant strains and constructs*

Mutant strains were generated by splicing-by-overlap extension PCR and natural transformation / cotransformation / MuGENT exactly as previously described (1,7). All primers used for making mutant constructs can be found in **Table S3**.

#### *V. cholerae transformation assays*

Cells were induced to competence by incubation on chitin (Figure 1 and 2) or via ectopic expression of *tfoX* ( $P_{tac}$ -*tfoX*, Figure 3-5)) exactly as previously described (1,7). Briefly, competent cells were incubated with tDNA statically at 30°C for ~5 hours. The tDNA used to test transformation efficiencies throughout this study was ~500 ng of a linear PCR product that replaced the frame-shifted transposase, VC1807, with an antibiotic resistance cassette (i.e.  $\Delta$ VC1807::Ab<sup>R</sup>). After incubation with tDNA, reactions were outgrown by adding LB and shaking at 37°C for 2 hours. Reactions were then plated for quantitative culture onto selective media (transformants) and onto nonselective media (total viable counts) to determine the transformation efficiency (defined as transformants / total viable counts).

#### *MuGENT / Cotransformation in V. cholerae*

Cells were induced to competence exactly as described above for transformation assays. Competent cells were incubated with ~50 ng of a selected product (generally  $\Delta$ VC1807::Ab<sup>R</sup>) and ~3000 ng of each unselected product unless otherwise specified. Cells were incubated with tDNA and plated exactly as described above for transformation assays.

Mutations were detected in output transformants by MASC-PCR, which was carried out exactly as previously described (1,30). See **Table S3** for a list of all primers used for MASC-PCR. To generate the  $\Delta 10xSBS$  and  $\Delta 12$  DGC mutants, the most highly edited strain obtained in the first cycle of MuGENT (from 48 screened) was subjected to an additional round of MuGENT using mutant constructs distinct from those integrated in the first cycle. This process was iteratively performed until all genome edits were incorporated (between 3 and 4 cycles were required for all mutants generated in this study).

To repair the  $P_{tac-tfoX}$ ,  $recJ$ ,  $exoVII$ ,  $P_{tac-mutL}$  E32K, and  $lacZ::lacIq$  mutations in the  $\Delta 10xSBS$  and  $\Delta 12$  DGC mutants, strains were subjected to MuGENT to revert these mutations using mutant constructs amplified from the wildtype strain. Reversion of these mutations was confirmed by MASC-PCR and through whole genome sequencing.

#### *Fluctuation analysis for determining mutation rates*

Fluctuation analysis for each strain tested was performed by inoculating  $10^3$  cells into 10 parallel LB cultures and growing overnight at  $30^\circ\text{C}$  for exactly 24 hours. Then, each reaction was plated for quantitative culture on media containing  $100 \mu\text{g} / \text{mL}$  rifampicin (to select for spontaneous rifampicin resistant mutants) and onto nonselective media (to determine the total viable counts in each culture). Mutation rates were then estimated using the Ma-Sandri-Sarkar Maximum Likelihood Estimator (MSS-MLE) method using the online FALCOR web interface (31,32).

#### *Whole genome sequencing*

Sequencing libraries for genomic DNA were prepared for sequencing on the Illumina platform exactly as previously described (33). Data were then analyzed for single nucleotide variants and small ( $<5\text{bp}$ ) indels relative to a reference genome using the CLC Genomics Workbench (Qiagen) exactly as previously described (34).

#### *RNA-seq analysis*

RNA was purified using Trizol reagent (ThermoFisher) and then sequencing libraries were prepared using RNAtag-Seq exactly as previously described (35). Reads obtained were mapped to the N16961 reference genome (accession: NC\_002505 and NC\_002506) and analyzed using the Tufts University Galaxy server (36). Normalized transcript abundance was measured by aggregating reads within a gene and then normalizing for the size of the gene.

#### *Image analysis for division accuracy and FtsZ cell cycle choreography*

Cells were grown in M9 minimal medium supplemented with 0.2% fructose and 1 µg/mL thiamine to exponential phase and then spread on a 1% (w/v) agarose pad of the same medium for microscopic analysis. Septum accuracy was determined in snapshot cell images acquired using a DM6000-B (Leica) microscope and analyzed using MicrobeTracker. FtsZ cell cycle choreography was determined in time-lapse experiments, the slides were incubated at 30 °C and images acquired using an Evolve 512 EMCCD camera (Roper Scientific) attached to an Axio Observe spinning disk (Zeiss). Image analysis was done as previously described (11,37), in the cell cycle representations colors were assigned to the maximal and minimal fluorescence intensity projections observed at each time point of the time-lapse.

#### *Assaying intracellular c-di-GMP*

To determine intracellular c-di-GMP, overnight cultures were back diluted (1:1000) into 2 mL cultures and grown to the appropriate OD<sub>600</sub> (LCD: 0.200 – 0.300, HCD: ~1.00). An aliquot (1.5 mL) of each culture was centrifuged at 15,000 rpm for 30 s and decanted. The remaining pellet was resuspended in 100 µL of cold extraction buffer (40% acetonitrile–40%methanol–0.1Nformic acid) and incubated at -20°C for 30 min. The sample was centrifuged at 15,000 rpm for 10 min and the supernatant was collected. The solvent was evaporated via a vacuum manifold and the pellet was stored at -80°C. The pellet was resuspended in 100 µL of HPLC-grade water before quantification of c-di-GMP by an Acquity Ultra Performance liquid chromatography system coupled with a Quattro Premier XE mass spectrometer as previously described (Massie 2012). An 8-point standard curve ranging from 1.9 nM to 250 nM of chemically synthesized c-di-GMP (Biolog) was used to



determine [c-di-GMP]. Intracellular concentration of c-di-GMP was estimated as described (16). Because the total c-di-GMP that is measured was divided by a larger intracellular volume at HCD due to higher numbers of cells, this results in HCD having a lower limit of detection for estimated intracellular c-di-GMP than LCD.

### *Swim assays*

Swimming motility was assayed essentially as previously described (38). Briefly, indicated strains were stabbed into the center of an LB+0.3% soft agar motility plate and then incubated at 30°C for 16 hours. Data is shown as the diameter of the swim radius in mm.

### *Biofilm assays*

The MBEC Assay System (Innovotech) was used to quantify biofilm formation. An aliquot of each overnight culture (1.5 mL) was pelleted by centrifugation at 15,000 rpm for 3 min. The pellet was washed 3 times with DPBS (1 mL) and resuspended in 1 mL of LB liquid media. The resulting culture was back-diluted to an estimated  $OD_{600} = 0.001$  and aliquoted onto a 96-well MBEC Assay plate (160  $\mu$ L/well, n=5). Strains harboring pMLH17 were induced with 0.2% arabinose and selected with ampicillin (100  $\mu$ g/mL) before being aliquoted. The plate was incubated at 37°C for 24 hours shaking at 150 rpm in a humidity chamber to grow biofilms. Biofilm formation was determined by crystal violet staining as previously described (39).

### *A. baylyi transformation assays*

To test transformation efficiency, *A. baylyi* strains were first grown overnight (16-24 hours) in LB medium. Overnight cultures were then spun and resuspended in fresh LB medium to an  $OD_{600} = 2.0$ . Then, for each transformation reaction, 50  $\mu$ L of this culture was diluted into 450  $\mu$ L of fresh LB medium. Transforming DNA was then added and reactions were incubated at 30°C shaking for 5 hours. The tDNA used to test transformation efficiency in this study replaces a frame-shifted transposase gene, ACIAD1551, with an Ab<sup>R</sup>. Following incubation with tDNA, reactions were plated for quantitative culture onto

selective and nonselective media to determine the transformation efficiency as described above.

## ACKNOWLEDGEMENTS

We would like to thank Neil Greene for helpful discussions and assistance with whole genome sequencing. We would also like to thank Tufts TUCF Genomics, the Indiana University CGB, and the Michigan State University Mass Spectrometry Facility for assistance with whole genome sequencing and mass spectrometry, respectively. This work was supported by US National Institutes of Health Grant AI118863 to ABD, GM109259 to CMW, and startup funds from Indiana University. EG and FXB were financially supported by the European Research Council under the European Community's Seventh Framework Programme [FP7/2007-2013 Grant Agreement no. 281590].

## REFERENCES

1. Dalia, A.B., McDonough, E. and Camilli, A. (2014) Multiplex genome editing by natural transformation. *Proc Natl Acad Sci U S A*, **111**, 8937-8942.
2. Watt, V.M., Ingles, C.J., Urdea, M.S. and Rutter, W.J. (1985) Homology requirements for recombination in *Escherichia coli*. *Proc Natl Acad Sci U S A*, **82**, 4768-4772.
3. Lorenz, M.G. and Wackernagel, W. (1994) Bacterial gene transfer by natural genetic transformation in the environment. *Microbiol Rev*, **58**, 563-602.
4. Marvig, R.L. and Blokesch, M. (2010) Natural transformation of *Vibrio cholerae* as a tool--optimizing the procedure. *BMC Microbiol*, **10**, 155.
5. Blokesch, M. and Schoolnik, G.K. (2008) The extracellular nuclease Dns and its role in natural transformation of *Vibrio cholerae*. *J Bacteriol*, **190**, 7232-7240.
6. Burdett, V., Baitinger, C., Viswanathan, M., Lovett, S.T. and Modrich, P. (2001) In vivo requirement for RecJ, ExoVII, ExoI, and ExoX in methyl-directed mismatch repair. *Proc Natl Acad Sci U S A*, **98**, 6765-6770.
7. Dalia, A.B., Lazinski, D.W. and Camilli, A. (2014) Identification of a membrane-bound transcriptional regulator that links chitin and natural competence in *Vibrio cholerae*. *MBio*, **5**, e01028-01013.

8. Claverys, J.P. and Lacks, S.A. (1986) Heteroduplex deoxyribonucleic acid base mismatch repair in bacteria. *Microbiol Rev*, **50**, 133-165.
9. Claverys, J.P., Mejean, V., Gasc, A.M. and Sicard, A.M. (1983) Mismatch repair in *Streptococcus pneumoniae*: relationship between base mismatches and transformation efficiencies. *Proc Natl Acad Sci U S A*, **80**, 5956-5960.
10. Nyerges, A., Csorgo, B., Nagy, I., Latinovics, D., Szamecz, B., Posfai, G. and Pal, C. (2014) Conditional DNA repair mutants enable highly precise genome engineering. *Nucleic Acids Res*.
11. Galli, E., Poidevin, M., Le Bars, R., Desfontaines, J.M., Muresan, L., Paly, E., Yamaichi, Y. and Barre, F.X. (2016) Cell division licensing in the multi-chromosomal *Vibrio cholerae* bacterium. *Nat Microbiol*, **1**, 16094.
12. Humbert, O., Prudhomme, M., Hakenbeck, R., Dowson, C.G. and Claverys, J.P. (1995) Homeologous recombination and mismatch repair during transformation in *Streptococcus pneumoniae*: saturation of the Hex mismatch repair system. *Proc Natl Acad Sci U S A*, **92**, 9052-9056.
13. Hayes, C.A., Dalia, T.N. and Dalia, A.B. (2017) Systematic genetic dissection of PTS in *Vibrio cholerae* uncovers a novel glucose transporter and a limited role for PTS during infection of a mammalian host. *Mol Microbiol*.
14. Romling, U., Galperin, M.Y. and Gomelsky, M. (2013) Cyclic di-GMP: the first 25 years of a universal bacterial second messenger. *Microbiol Mol Biol Rev*, **77**, 1-52.
15. D'Souza, M., Glass, E.M., Syed, M.H., Zhang, Y., Rodriguez, A., Maltsev, N. and Galperin, M.Y. (2007) Sentra: a database of signal transduction proteins for comparative genome analysis. *Nucleic Acids Res*, **35**, D271-273.
16. Massie, J.P., Reynolds, E.L., Koestler, B.J., Cong, J.P., Agostoni, M. and Waters, C.M. (2012) Quantification of high-specificity cyclic diguanylate signaling. *Proc Natl Acad Sci U S A*, **109**, 12746-12751.
17. Liu, X., Beyhan, S., Lim, B., Linington, R.G. and Yildiz, F.H. (2010) Identification and characterization of a phosphodiesterase that inversely regulates motility and biofilm formation in *Vibrio cholerae*. *J Bacteriol*, **192**, 4541-4552.
18. Townsley, L. and Yildiz, F.H. (2015) Temperature affects c-di-GMP signalling and biofilm formation in *Vibrio cholerae*. *Environ Microbiol*, **17**, 4290-4305.

19. Waters, C.M., Lu, W., Rabinowitz, J.D. and Bassler, B.L. (2008) Quorum sensing controls biofilm formation in *Vibrio cholerae* through modulation of cyclic di-GMP levels and repression of *vpsT*. *J Bacteriol*, **190**, 2527-2536.
20. Hengge, R. (2009) Principles of c-di-GMP signalling in bacteria. *Nat Rev Microbiol*, **7**, 263-273.
21. Yildiz, F.H., Dolganov, N.A. and Schoolnik, G.K. (2001) VpsR, a Member of the Response Regulators of the Two-Component Regulatory Systems, Is Required for Expression of *vps* Biosynthesis Genes and EPS(ETr)-Associated Phenotypes in *Vibrio cholerae* O1 El Tor. *J Bacteriol*, **183**, 1716-1726.
22. Srivastava, D., Harris, R.C. and Waters, C.M. (2011) Integration of cyclic di-GMP and quorum sensing in the control of *vpsT* and *aphA* in *Vibrio cholerae*. *J Bacteriol*, **193**, 6331-6341.
23. Krasteva, P.V., Fong, J.C., Shikuma, N.J., Beyhan, S., Navarro, M.V., Yildiz, F.H. and Sondermann, H. (2010) *Vibrio cholerae* VpsT regulates matrix production and motility by directly sensing cyclic di-GMP. *Science*, **327**, 866-868.
24. Jones, C.J., Utada, A., Davis, K.R., Thongsomboon, W., Zamorano Sanchez, D., Banakar, V., Cegelski, L., Wong, G.C. and Yildiz, F.H. (2015) C-di-GMP Regulates Motile to Sessile Transition by Modulating MshA Pili Biogenesis and Near-Surface Motility Behavior in *Vibrio cholerae*. *PLoS Pathog*, **11**, e1005068.
25. Harms, K., Schon, V., Kickstein, E. and Wackernagel, W. (2007) The RecJ DNase strongly suppresses genomic integration of short but not long foreign DNA fragments by homology-facilitated illegitimate recombination during transformation of *Acinetobacter baylyi*. *Mol Microbiol*, **64**, 691-702.
26. Dalia, T.N., Hayes, C.A., S., S., Marx, C.J., Mckinlay, J.B. and Dalia, A.B. (2017) Multiplex genome editing by natural transformation (MuGENT) for synthetic biology in *Vibrio natriegens*. *bioRxiv*, doi:10.1101/122655.
27. Bubendorfer, S., Krebs, J., Yang, I., Hage, E., Schulz, T.F., Bahlawane, C., Didelot, X. and Suerbaum, S. (2016) Genome-wide analysis of chromosomal import patterns after natural transformation of *Helicobacter pylori*. *Nat Commun*, **7**, 11995.

28. Miller, V.L., DiRita, V.J. and Mekalanos, J.J. (1989) Identification of *toxS*, a regulatory gene whose product enhances *toxR*-mediated activation of the cholera toxin promoter. *J Bacteriol*, **171**, 1288-1293.
29. Juni, E. and Janik, A. (1969) Transformation of *Acinetobacter calco-aceticus* (*Bacterium anitratum*). *J Bacteriol*, **98**, 281-288.
30. Wang, H.H., Isaacs, F.J., Carr, P.A., Sun, Z.Z., Xu, G., Forest, C.R. and Church, G.M. (2009) Programming cells by multiplex genome engineering and accelerated evolution. *Nature*, **460**, 894-898.
31. Hall, B.M., Ma, C.X., Liang, P. and Singh, K.K. (2009) Fluctuation analysis CalculatOR: a web tool for the determination of mutation rate using Luria-Delbruck fluctuation analysis. *Bioinformatics*, **25**, 1564-1565.
32. Rosche, W.A. and Foster, P.L. (2000) Determining mutation rates in bacterial populations. *Methods*, **20**, 4-17.
33. Lazinski, D.W. and Camilli, A. (2013) Homopolymer tail-mediated ligation PCR: a streamlined and highly efficient method for DNA cloning and library construction. *Biotechniques*, **54**, 25-34.
34. Seed, K.D., Yen, M., Shapiro, B.J., Hilaire, I.J., Charles, R.C., Teng, J.E., Ivers, L.C., Boncy, J., Harris, J.B. and Camilli, A. (2014) Evolutionary consequences of intra-patient phage predation on microbial populations. *eLife*, **3**, e03497.
35. Shishkin, A.A., Giannoukos, G., Kucukural, A., Ciulla, D., Busby, M., Surka, C., Chen, J., Bhattacharyya, R.P., Rudy, R.F., Patel, M.M. *et al.* (2015) Simultaneous generation of many RNA-seq libraries in a single reaction. *Nat Methods*, **12**, 323-325.
36. Afgan, E., Baker, D., van den Beek, M., Blankenberg, D., Bouvier, D., Cech, M., Chilton, J., Clements, D., Coraor, N., Eberhard, C. *et al.* (2016) The Galaxy platform for accessible, reproducible and collaborative biomedical analyses: 2016 update. *Nucleic Acids Res*, **44**, W3-W10.
37. Galli, E., Paly, E. and Barre, F.X. (2017) Late assembly of the *Vibrio cholerae* cell division machinery postpones septation to the last 10% of the cell cycle. *Sci Rep*, **7**, 44505.
38. Wolfe, A.J. and Berg, H.C. (1989) Migration of bacteria in semisolid agar. *Proc Natl Acad Sci U S A*, **86**, 6973-6977.

39. Sambanthamoorthy, K., Gokhale, A.A., Lao, W., Parashar, V., Neiditch, M.B., Semmelhack, M.F., Lee, I. and Waters, C.M. (2011) Identification of a novel benzimidazole that inhibits bacterial biofilm formation in a broad-spectrum manner. *Antimicrob Agents Chemother*, **55**, 4369-4378.

## FIGURE LEGENDS

**Fig. 1** – *The ssDNA exonucleases RecJ and ExoVII limit natural transformation in V. cholerae*. Natural transformation assays of the indicated *V. cholerae* strains with a PCR product as tDNA that has (A) 3kb arms of homology on each side of an antibiotic resistance marker (i.e. 3/3 kb) or (B) a product where one arm of homology is reduced to just 80bp (i.e. 0.08/3 kb). Data are from at least three independent biological replicates and shown as the mean  $\pm$  SD. Statistical comparisons were made by Student's t-test to the wildtype (WT) strain. \* =  $p < 0.05$ , \*\* =  $p < 0.01$ , and \*\*\* =  $p < 0.001$ .

**Fig. 2** – *Efficient cotransformation of ssDNA exonuclease mutants using mutant constructs made in a single PCR reaction*. (A) Schematic indicating how 0.08/3 kb unselected products are generated in a single PCR reaction. The mutation in the unselected product is indicated as a red box and the relative positions of the oligonucleotides used for amplification are highlighted by black arrows. (B) Cotransformation assays using 50 ng of a selected product and 3000 ng of an unselected product (all are 0.08/3 kb) into the indicated strain backgrounds. The different unselected products tested generate the indicated type of mutation in the *lacZ* gene. (C) Cotransformation assays in a  $\Delta recJ \Delta exoVII$  mutant using 50 ng of a selected product and the indicated amount of an unselected product (0.08/3 kb) that introduces a 50 bp deletion into the *lacZ* gene. (D) Cotransformation assays in a  $\Delta recJ \Delta exoVII$  mutant using 50 ng of a selected product and 3000 ng of an unselected product (X/3 kb) that introduces a 50 bp deletion into the *lacZ* gene. All data are from at least three independent biological replicates and shown as the mean  $\pm$  SD. LOD = limit of detection and PM = point mutation.

**Fig. 3** – *Cotransformation of single point mutations into ssDNA exonuclease mutants is inhibited by MMR and can be overcome by transient expression of a dominant negative allele*

of *MutL*. **(A)** Cotransformation assay using an unselected product (0.04/3 kb) to introduce a transversion or transition nonsense point mutation into the *lacZ* gene of the  $P_{tac}$ -*tfoX*  $\Delta recJ$   $\Delta exoVII$  parent or an isogenic  $\Delta mutS$  mutant. **(B)** Fluctuation analysis for spontaneous resistance to rifampicin to determine the mutation rate of the indicated strains. **(C)** Cotransformation assays in the indicated strains using an unselected product to introduce a transition nonsense point mutation into the *lacZ* gene. All data from **A** and **C** are the result of at least 3 independent biological replicates and data from **B** are from at least 10 independent biological replicates. All data are shown as the mean  $\pm$  SD. \*\* =  $p < 0.01$ , \*\*\* =  $p < 0.001$ , and NS = not significant.

**Fig. 4** – *Exo-MuGENT* used to rapidly assess the role of DNA binding sites for the nucleoid occlusion protein *SlmA*. **(A)** *Exo-MuGENT* was performed in the indicated strains using 100 ng of a selected product and 3000 ng each of 5 distinct unselected products (0.04/3 kb) that introduce point mutations into high-affinity SBSs. Results are shown as the frequency of strains with the indicated number of genome edits following one cycle of *MuGENT*. **(B)** Cell division accuracy histograms of the indicated strains. Inset values indicate division accuracy, which is defined as the total percentage of cells with a constriction site distant from mid-cell by less than 5%, and the total number of cells analyzed. **(C)** Phase contrast images of rare asymmetric cell division events observed in the  $\Delta 10xSBS$  strain background. Scale bar = 2  $\mu m$ .

**Fig. 5** – *Exo-MuGENT* for rapid genetic dissection of diguanylate cyclases. **(A)** Distribution of genome edits in a population of cells following one cycle of *Exo-MuGENT* using single PCR mutant constructs (0.04/3 kb) that target 12 DGC genes for inactivation. **(B)** MASC-PCR gel for DGC genome edits in intermediate strains leading to generation of the  $\Delta 12$  DGC mutant. **(C)** Intracellular c-di-GMP concentration of the indicated strains at low cell density (LCD) and high cell density (HCD). Data are from five independent biological replicates and shown as the mean  $\pm$  SD. **(D)** Representative image of a swim assay of the indicated strains with quantification of the swim diameter from six biological replicates shown below as the mean  $\pm$  SD. **(E)** Biofilm assay for the indicated strains. pMLH17 harbors an arabinose-inducible copy of the *vpsR* gene. **(F)** Swim assays of the indicated strains. Data are from at

least 8 independent biological replicates and shown as the mean  $\pm$  SD. \* =  $p < 0.05$ , \*\* =  $p < 0.01$ , \*\*\* =  $p < 0.001$ , and NS = not significant.

**Fig. 6** – *ssDNA exonucleases inhibit natural transformation in Acinetobacter baylyi*. **(A)** Transformation assay of the indicated strains using tDNA that contains either 0.08/3 kb arms of homology or 3/3 kb arms of homology as indicated. Data are the result of at least three independent biological replicates and shown as the mean  $\pm$  SD. \*\* =  $p < 0.01$  and \*\*\* =  $p < 0.001$ .



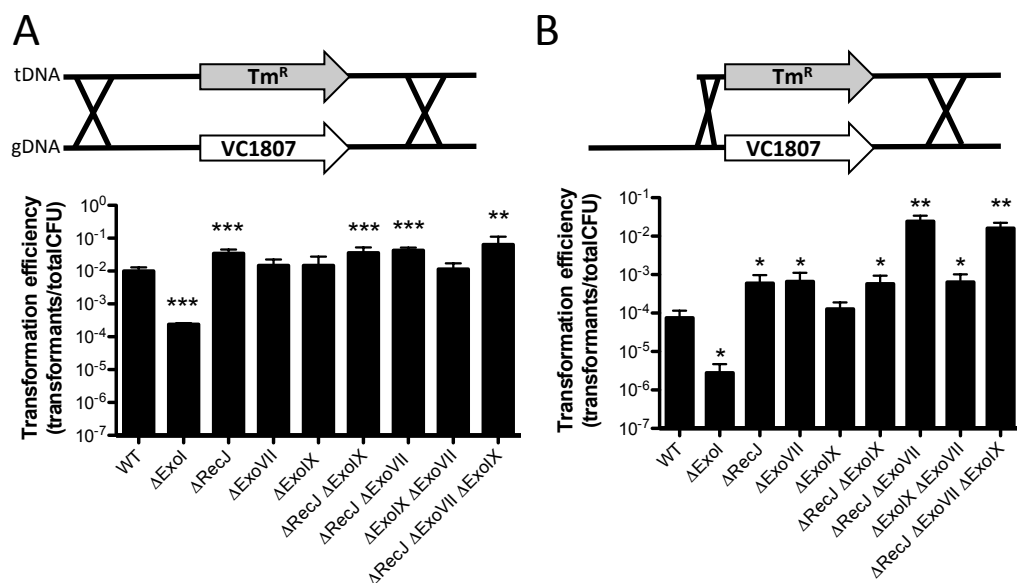

**Fig. 1** – The ssDNA exonucleases *RecJ* and *ExoVII* limit natural transformation in *V. cholerae*. Natural transformation assays of the indicated *V. cholerae* strains with a PCR product as tDNA that has **(A)** 3kb arms of homology on each side of an antibiotic resistance marker (i.e. 3/3 kb) or **(B)** a product where one arm of homology is reduced to just 80bp (i.e. 0.08/3 kb). Data are from at least three independent biological replicates and shown as the mean  $\pm$  SD. Statistical comparisons were made by Student's t-test to the wildtype (WT) strain. \* =  $p < 0.05$ , \*\* =  $p < 0.01$ , and \*\*\* =  $p < 0.001$ .

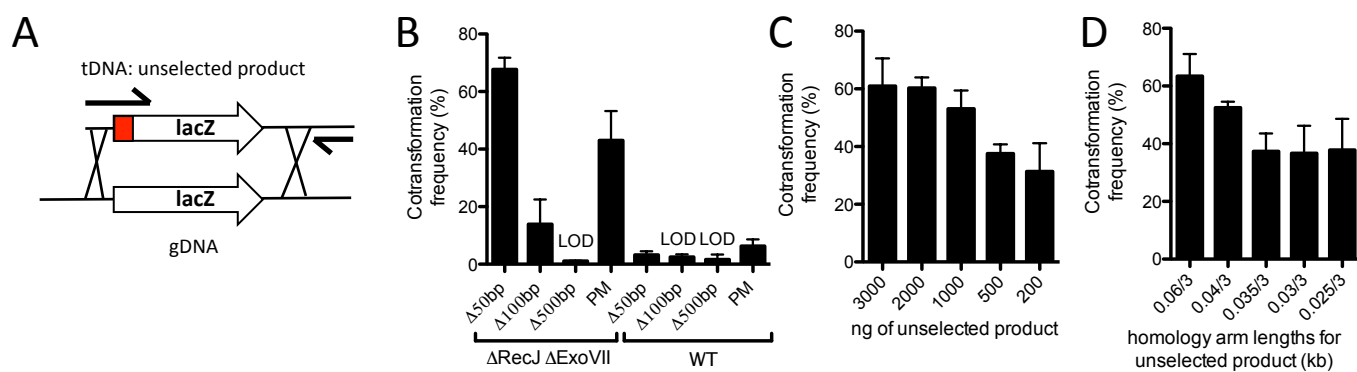

**Fig. 2 – Efficient cotransformation of ssDNA exonuclease mutants using mutant constructs made in a single PCR reaction. (A)** Schematic indicating how 0.08/3 kb unselected products are generated in a single PCR reaction. The mutation in the unselected product is indicated as a red box and the relative positions of the oligonucleotides used for amplification are highlighted by black arrows. **(B)** Cotransformation assays using 50 ng of a selected product and 3000 ng of an unselected product (all are 0.08/3 kb) into the indicated strain backgrounds. The different unselected products tested generate the indicated type of mutation in the *lacZ* gene. **(C)** Cotransformation assays in a  $\Delta$ *recJ*  $\Delta$ *exoVII* mutant using 50 ng of a selected product and the indicated amount of an unselected product (0.08/3 kb) that introduces a 50 bp deletion into the *lacZ* gene. **(D)** Cotransformation assays in a  $\Delta$ *recJ*  $\Delta$ *exoVII* mutant using 50 ng of a selected product and 3000 ng of an unselected product (X/3 kb) that introduces a 50 bp deletion into the *lacZ* gene. All data are from at least three independent biological replicates and shown as the mean  $\pm$  SD. LOD = limit of detection and PM=point mutation.

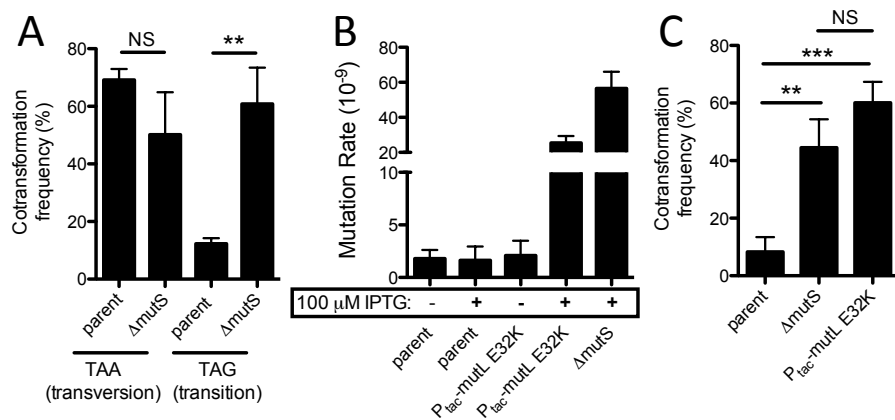

**Fig. 3** – Cotransformation of single point mutations into ssDNA exonuclease mutants is inhibited by MMR and can be overcome by transient expression of a dominant negative allele of *MutL*. (A) Cotransformation assay using an unselected product (0.04/3 kb) to introduce a transversion or transition nonsense point mutation into the *lacZ* gene of the  $P_{tac}$ -*tfoX*  $\Delta$ *recJ*  $\Delta$ *exoVII* parent or an isogenic  $\Delta$ *mutS* mutant. (B) Fluctuation analysis for spontaneous resistance to rifampicin to determine the mutation rate of the indicated strains. (C) Cotransformation assays in the indicated strains using an unselected product to introduce a transition nonsense point mutation into the *lacZ* gene. All data from A and C are the result of at least 3 independent biological replicates and data from B are from at least 10 independent biological replicates. All data are shown as the mean  $\pm$  SD. \*\* =  $p < 0.01$ , \*\*\* =  $p < 0.001$ , and NS = not significant.

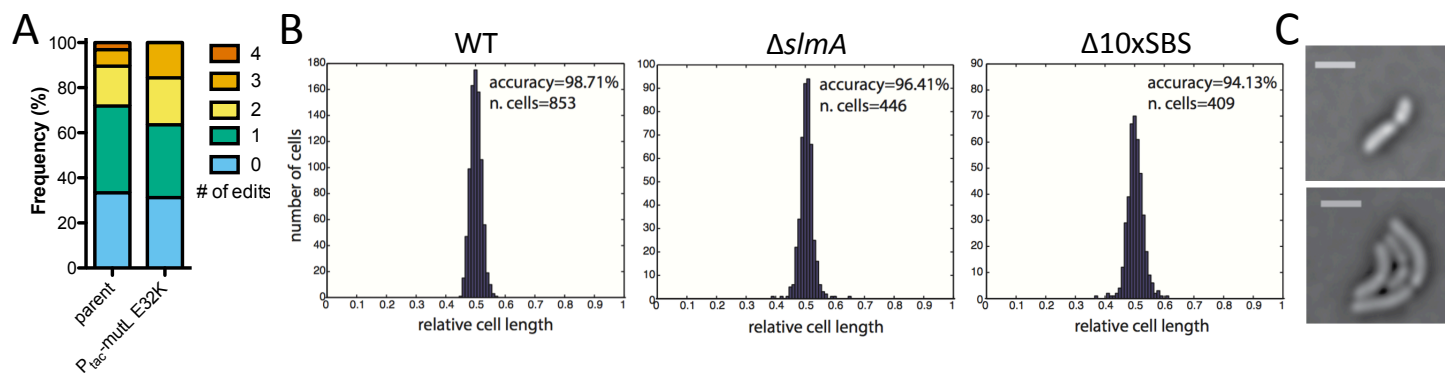

**Fig. 4 – Exo-MuGENT used to rapidly assess the role of DNA binding sites for the nucleoid occlusion protein *SlmA*.** (A) Exo-MuGENT was performed in the indicated strains using 100 ng of a selected product and 3000 ng each of 5 distinct unselected products (0.04/3 kb) that introduce point mutations into high-affinity SBSs. Results are shown as the frequency of strains with the indicated number of genome edits following one cycle of MuGENT. (B) Cell division accuracy histograms of the indicated strains. Inset values indicate division accuracy, which is defined as the total percentage of cells with a constriction site distant from mid-cell by less than 5%, and the total number of cells analyzed. (C) Phase contrast images of rare asymmetric cell division events observed in the  $\Delta 10xSBS$  strain background. Scale bar = 2  $\mu m$ .

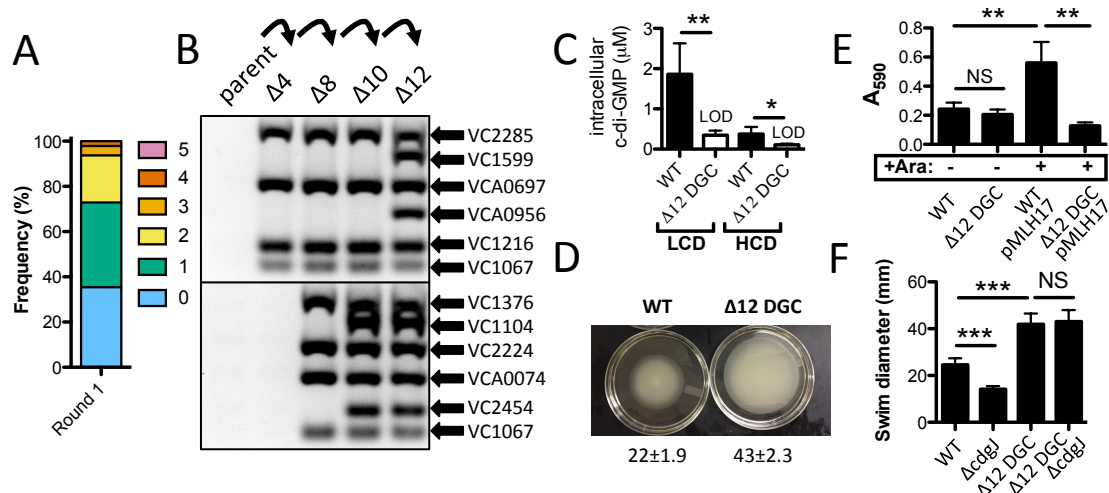

**Fig. 5 – Exo-MuGENT for rapid genetic dissection of diguanylate cyclases.** (A) Distribution of genome edits in a population of cells following one cycle of Exo-MuGENT using single PCR mutant constructs (0.04/3 kb) that target 12 DGC genes for inactivation. (B) MASC-PCR gel for DGC genome edits in intermediate strains leading to generation of the  $\Delta 12$  DGC mutant. (C) Intracellular c-di-GMP concentration of the indicated strains at low cell density (LCD) and high cell density (HCD). Data are from five independent biological replicates and shown as the mean  $\pm$  SD. (D) Representative image of a swim assay of the indicated strains with quantification of the swim diameter from six biological replicates shown below as the mean  $\pm$  SD. (E) Biofilm assay for the indicated strains. pMLH17 harbors an arabinose-inducible copy of the *vpsR* gene. (F) Swim assays of the indicated strains. Data are from at least 8 independent biological replicates and shown as the mean  $\pm$  SD. \* =  $p < 0.05$ , \*\* =  $p < 0.01$ , \*\*\* =  $p < 0.001$ , and NS = not significant.

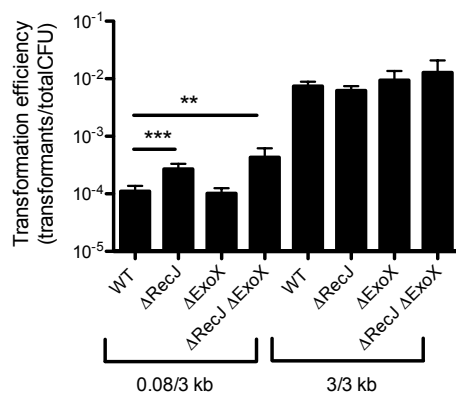

**Fig. 6** – *ssDNA exonucleases inhibit natural transformation in Acinetobacter baylyi*. (A)

Transformation assay of the indicated strains using tDNA that contains either 0.08/3 kb arms of homology or 3/3 kb arms of homology as indicated. Data are the result of at least three independent biological replicates and shown as the mean  $\pm$  SD. \*\* =  $p < 0.01$  and \*\*\* =  $p < 0.001$ .

## SUPPLEMENTARY FIGURES

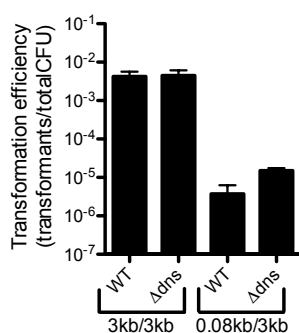

**Fig. S1** – *Dns* does not inhibit natural transformation of tDNA with one small arm of homology. Natural transformation assay of the indicated strains with tDNA containing the indicated length of homology on either side of the mutation. All data are the result of at least three independent biological replicates and are shown as the mean ± SD.

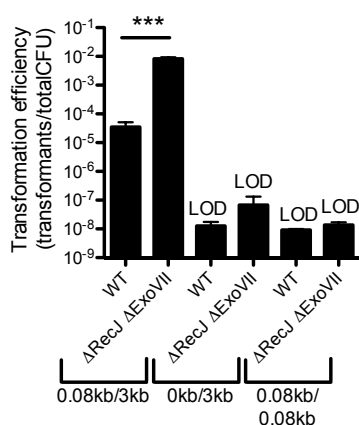

**Fig. S2** – High efficiency transformation requires two arms of homology where at least one arm is long. Natural transformation assay of the indicated strains with tDNA containing the indicated length of homology on either side of the mutation. All data are the result of at least three independent biological replicates and are shown as the mean ± SD. \*\*\* =  $p < 0.001$  and LOD = limit of detection.

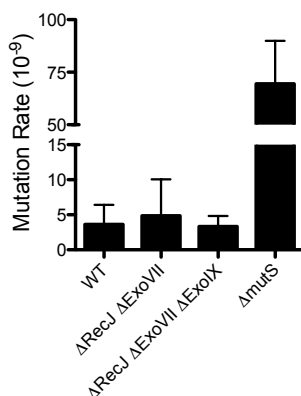

**Fig. S3** – Loss of *recJ* and *exoVII* does not increase mutation rate. Fluctuation analysis for spontaneous resistance to rifampicin was performed to assess the mutation rate of the indicated strains. All data are from at least 10 independent biological replicates and shown as the mean  $\pm$  SD.

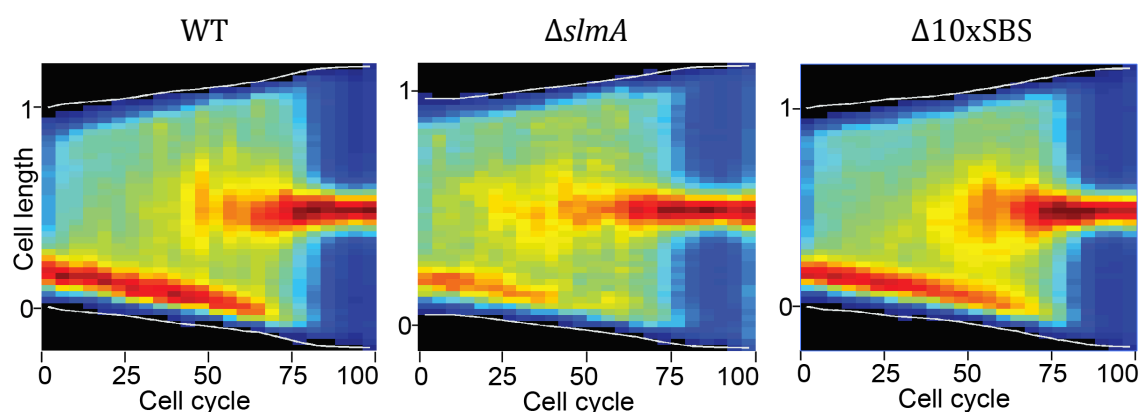

**Fig. S4** – *FtsZ* localization during the cell cycle is largely unchanged in the Δ10xSBS mutant. Cell cycle choreography for FtsZ-RFPT. Dark red and blue colors were assigned to the maximal and minimal fluorescence intensity projections observed at each time point, respectively. This representation highlights changes in the relative distribution of fluorescence along the long cell axis. Data for each sample are the compilation of data from 40 to 80 single cells.



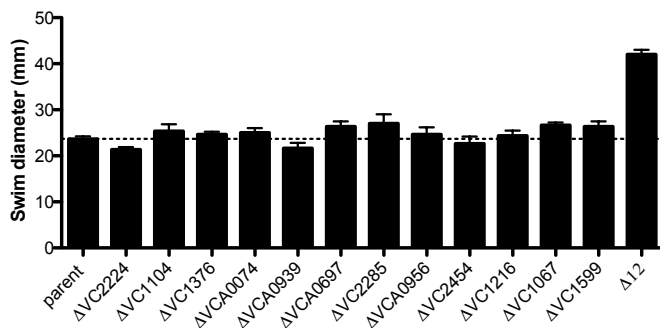

**Fig. S5** – The 12 DGCs targeted act additively or synergistically to reduce swimming motility in *V. cholerae*. Swim assay performed for the indicated strains. All strains are in a  $P_{tac}$ -*tfoX*  $\Delta recJ$   $\Delta exoVII$  parent strain background. Data are the result of at least three independent biological replicates and shown as the mean  $\pm$  SD.

## SUPPLEMENTARY TABLES

**Table S1** – RNA-seq expression analysis of all DGCs in *V. cholerae* during growth in rich medium

| Locus <sup>&amp;</sup> | Gene name | Replicate 1 <sup>§</sup> | Replicate 2 <sup>§</sup> | Replicate 3 <sup>§</sup> | Average expression <sup>#</sup> | Expression rank <sup>*</sup> | Biofilm <sup>%</sup> | Motility <sup>%</sup> |
|------------------------|-----------|--------------------------|--------------------------|--------------------------|---------------------------------|------------------------------|----------------------|-----------------------|
| VC0072                 |           | 0.155                    | 0.135                    | 0.111                    | 0.134                           | 20                           |                      |                       |
| VC0130                 |           | 0.182                    | 0.140                    | 0.221                    | 0.181                           | 16                           |                      |                       |
| VC0398                 |           | 0.278                    | 0.250                    | 0.260                    | 0.263                           | 10                           |                      |                       |
| VC0653                 | rocS      | 0.378                    | 0.394                    | 0.760                    | 0.510                           | 2                            |                      | ↓                     |
| VC0658                 |           | 0.084                    | 0.123                    | 0.172                    | 0.126                           | 21                           |                      |                       |
| VC0703                 | mbaA      | 0.305                    | 0.262                    | 0.207                    | 0.258                           | 11                           |                      |                       |
| VC0900                 | cdgG      | 0.303                    | 0.379                    | 0.422                    | 0.368                           | 3                            |                      |                       |
| VC1029                 |           | 0.080                    | 0.072                    | 0.076                    | 0.076                           | 30                           |                      |                       |
| VC1067                 | cdgH      | 0.289                    | 0.351                    | 0.184                    | 0.275                           | 8                            | ↓                    | ↑                     |
| VC1104                 | cdgK      | 0.080                    | 0.082                    | 0.059                    | 0.074                           | 32                           | ↓                    | ↑                     |
| VC1185                 |           | 0.053                    | 0.056                    | 0.068                    | 0.059                           | 37                           |                      |                       |
| VC1216                 |           | 0.083                    | 0.152                    | 0.690                    | 0.308                           | 5                            |                      |                       |
| VC1353                 |           | 0.150                    | 0.146                    | 0.206                    | 0.167                           | 18                           |                      |                       |
| VC1367                 |           | 0.445                    | 0.360                    | 0.273                    | 0.359                           | 4                            |                      |                       |
| VC1370                 |           | 0.033                    | 0.034                    | 0.049                    | 0.039                           | 39                           |                      |                       |
| VC1372                 |           | 0.088                    | 0.130                    | 0.145                    | 0.121                           | 23                           |                      |                       |
| VC1376                 | cdgM      | 0.026                    | 0.072                    | 0.171                    | 0.089                           | 26                           | ↓                    |                       |
| VC1593                 | acgB      | 0.048                    | 0.029                    | 0.119                    | 0.065                           | 33                           |                      |                       |
| VC1599                 |           | 0.216                    | 0.246                    | 0.340                    | 0.267                           | 9                            |                      |                       |
| VC1934                 |           | 0.030                    | 0.023                    | 0.066                    | 0.040                           | 38                           |                      |                       |
| VC2224                 |           | 0.087                    | 0.070                    | 0.073                    | 0.077                           | 29                           |                      |                       |
| VC2285                 | cdgL      | 0.318                    | 0.235                    | 0.309                    | 0.287                           | 6                            | ↓                    | ↑                     |
| VC2370                 |           | 0.032                    | 0.041                    | 0.105                    | 0.059                           | 36                           |                      |                       |
| VC2454                 | vpvC      | 0.141                    | 0.180                    | 0.248                    | 0.189                           | 14                           | ↓                    | ↑                     |
| VC2697                 |           | 0.016                    | 0.004                    | 0.042                    | 0.020                           | 41                           |                      |                       |
| VC2750                 |           | 0.054                    | 0.041                    | 0.139                    | 0.078                           | 28                           |                      |                       |
| VCA0049                |           | 0.227                    | 0.122                    | 0.227                    | 0.192                           | 13                           |                      |                       |
| VCA0074                | cdgA      | 0.028                    | 0.038                    | 0.037                    | 0.034                           | 40                           | ↓                    |                       |
| VCA0080                |           | 0.081                    | 0.121                    | 0.168                    | 0.123                           | 22                           |                      |                       |
| VCA0165                |           | 0.148                    | 0.095                    | 0.377                    | 0.207                           | 12                           |                      |                       |
| VCA0217                |           | 0.084                    | 0.134                    | 0.121                    | 0.113                           | 24                           |                      |                       |
| VCA0557                |           | 0.152                    | 0.085                    | 0.269                    | 0.169                           | 17                           |                      |                       |
| VCA0560                |           | 0.179                    | 0.154                    | 0.118                    | 0.151                           | 19                           |                      |                       |
| VCA0697                | cdgD      | 0.590                    | 0.522                    | 0.443                    | 0.519                           | 1                            |                      | ↑                     |
| VCA0785                | cdgC      | 0.041                    | 0.029                    | 0.110                    | 0.060                           | 34                           |                      |                       |
| VCA0848                |           | 0.048                    | 0.051                    | 0.126                    | 0.075                           | 31                           |                      |                       |
| VCA0939                |           | 0.068                    | 0.043                    | 0.128                    | 0.080                           | 27                           |                      |                       |
| VCA0956                |           | 0.159                    | 0.171                    | 0.220                    | 0.183                           | 15                           |                      |                       |
| VCA0960                |           | 0.038                    | 0.048                    | 0.092                    | 0.060                           | 35                           |                      |                       |
| VCA0965                |           | 0.058                    | 0.073                    | 0.174                    | 0.102                           | 25                           |                      |                       |
| VCA1082                |           | 0.219                    | 0.296                    | 0.319                    | 0.278                           | 7                            |                      |                       |

<sup>&</sup>The 12 loci highlighted in blue were targeted for inactivation via Exo-MuGENT

<sup>§</sup>Data represent the relative transcript abundance of each gene indicated on the left in three independent biological replicates (see **Methods** for a detailed description on how this analysis was performed)

<sup>#</sup>Average expression is the mean of all three biological replicates.

<sup>\*</sup>Expression of each DGC is indicated on a scale from 1 (highest expression) to 41 (lowest expression)

%Mutants of the genes indicated have previously been observed to display an increase (↑) or decrease (↓) in biofilm formation or motility as indicated (1,2).

**Table S2 – Strains used in this study**

| Strain name in manuscript                                                                        | Genotype and antibiotic resistances                                                                                                       | Description                                                                                                                                                                  | Reference / (strain#)          |
|--------------------------------------------------------------------------------------------------|-------------------------------------------------------------------------------------------------------------------------------------------|------------------------------------------------------------------------------------------------------------------------------------------------------------------------------|--------------------------------|
| <b><i>V. cholerae</i> strains</b>                                                                |                                                                                                                                           |                                                                                                                                                                              |                                |
| WT                                                                                               | E7946 Sm <sup>R</sup>                                                                                                                     | Wildtype <i>V. cholerae</i> O1 El Tor strain. The parent strain used to make all <i>V. cholerae</i> mutants in this study                                                    | (3) / (SAD030)                 |
| ΔExoI                                                                                            | Δ <i>exoI</i> ::Kan <sup>R</sup> (i.e. ΔVC1234)                                                                                           | Introduced Δ <i>exoI</i> ::Kan <sup>R</sup> mutation into the wildtype strain background                                                                                     | This study (TND0111 / SAD1505) |
| ΔRecJ                                                                                            | Δ <i>recJ</i> ::Spec <sup>R</sup> (i.e. ΔVC2417)                                                                                          | Introduced Δ <i>recJ</i> ::Spec <sup>R</sup> mutation into the wildtype strain background                                                                                    | This study (TND0109 / SAD1506) |
| ΔExoIX                                                                                           | Δ <i>exoIX</i> ::Kan <sup>R</sup> (i.e. ΔVC0898)                                                                                          | Introduced Δ <i>exoIX</i> ::Kan <sup>R</sup> mutation into the wildtype strain background                                                                                    | This study (TND0110 / SAD1507) |
| ΔExoVII                                                                                          | Δ <i>exoVII</i> ::Carb <sup>R</sup> (i.e. ΔVC0766)                                                                                        | Introduced Δ <i>exoVII</i> ::Carb <sup>R</sup> mutation into the wildtype strain background                                                                                  | This study (TND0112 / SAD1508) |
| ΔRecJ ΔExoIX                                                                                     | Δ <i>recJ</i> ::Spec <sup>R</sup> , Δ <i>exoIX</i> ::Kan <sup>R</sup>                                                                     | Introduced Δ <i>exoIX</i> ::Kan <sup>R</sup> mutation into the TND0109 strain background                                                                                     | This study (TND0125 / SAD1509) |
| ΔRecJ ΔExoVII                                                                                    | Δ <i>recJ</i> ::Spec <sup>R</sup> , Δ <i>exoVII</i> ::Carb <sup>R</sup>                                                                   | Introduced Δ <i>exoVII</i> ::Carb <sup>R</sup> mutation into the TND0109 strain background                                                                                   | This study (TND0126 / SAD1510) |
| ΔExoIX ΔExoVII                                                                                   | Δ <i>exoIX</i> ::Kan <sup>R</sup> , Δ <i>exoVII</i> ::Carb <sup>R</sup>                                                                   | Introduced Δ <i>exoVII</i> ::Carb <sup>R</sup> mutation into the TND0110 strain background                                                                                   | This study (TND0127 / SAD1511) |
| ΔRecJ ΔExoVII ΔExoIX                                                                             | Δ <i>recJ</i> ::Spec <sup>R</sup> , Δ <i>exoVII</i> ::Carb <sup>R</sup> , Δ <i>exoIX</i> ::Kan <sup>R</sup>                               | Introduced Δ <i>exoVII</i> ::Carb <sup>R</sup> and Δ <i>exoIX</i> ::Kan <sup>R</sup> mutations into the TND0109 strain background                                            | This study (TND0118 / SAD1512) |
| P <sub>tac</sub> - <i>tfoX</i> Δ <i>recJ</i> Δ <i>exoVII</i>                                     | P <sub>tac</sub> - <i>tfoX</i> Δ <i>recJ</i> 501bp, Δ <i>exoVII</i> 501bp, ΔVC1807::Kan <sup>R</sup>                                      | MuGENT to introduce P <sub>tac</sub> - <i>tfoX</i> mutation and 501bp deletions into the 5' end of the <i>recJ</i> and <i>exoVII</i> genes in the wildtype strain background | This study (TND0195 / SAD1513) |
| P <sub>tac</sub> - <i>tfoX</i> Δ <i>recJ</i> Δ <i>exoVII</i> Δ <i>mutS</i>                       | P <sub>tac</sub> - <i>tfoX</i> Δ <i>recJ</i> 501bp, Δ <i>exoVII</i> 501bp, Δ <i>mutS</i> 501bp, ΔVC1807::Spec <sup>R</sup>                | Introduced a ~500bp deletion into the 5' end of the <i>mutS</i> gene in the TND0195 strain background via cotransformation                                                   | This study (SAD1252)           |
| P <sub>tac</sub> - <i>tfoX</i> Δ <i>recJ</i> Δ <i>exoVII</i> P <sub>tac</sub> - <i>mutL</i> E32K | P <sub>tac</sub> - <i>tfoX</i> Δ <i>recJ</i> 501bp, Δ <i>exoVII</i> 501bp, ΔVC1807::P <sub>tac</sub> - <i>mutL</i> E32K Spec <sup>R</sup> | Introduced the ΔVC1807::P <sub>tac</sub> - <i>mutL</i> E32K (Spec <sup>R</sup> -linked to this mutation) into the TND0195 strain background                                  | This study (SAD1308)           |
| P <sub>tac</sub> - <i>tfoX</i> Δ <i>recJ</i> Δ <i>exoVII</i> Δ <i>lacZ</i> :: <i>lacIq</i>       | P <sub>tac</sub> - <i>tfoX</i> Δ <i>recJ</i> 501bp, Δ <i>exoVII</i> 501bp, Δ <i>lacZ</i> :: <i>lacIq</i> , ΔVC1807::Spec <sup>R</sup>     | Introduced Δ <i>lacZ</i> :: <i>lacIq</i> mutation into TND0195 via cotransformation                                                                                          | This study (TND0252 / SAD1514) |
| ΔVC2224                                                                                          | P <sub>tac</sub> - <i>tfoX</i> Δ <i>recJ</i> 501bp, Δ <i>exoVII</i>                                                                       | Replaced ~50bp of the 5' end of                                                                                                                                              | This study                     |

|                              |                                                                                                                                                                                                                                                                                                                                   |                                                                                                                                         |                                |
|------------------------------|-----------------------------------------------------------------------------------------------------------------------------------------------------------------------------------------------------------------------------------------------------------------------------------------------------------------------------------|-----------------------------------------------------------------------------------------------------------------------------------------|--------------------------------|
|                              | 501bp, $\Delta lacZ::lacIq$ , $\Delta VC1807::Kan^R$ , $\Delta VC2224$                                                                                                                                                                                                                                                            | $\Delta VC2224$ with a premature stop codon containing sequence in the TND0252 strain background.                                       | (TND0383 / SAD1515)            |
| $\Delta VC1104$              | $P_{tac-tfoX} \Delta recJ$ 501bp, $\Delta exoVII$ 501bp, $\Delta lacZ::lacIq$ , $\Delta VC1807::Kan^R$ , $\Delta VC1104$                                                                                                                                                                                                          | Replaced ~50bp of the 5' end of $\Delta VC1104$ with a premature stop codon containing sequence in the TND0252 strain background.       | This study (TND0384 / SAD1516) |
| $\Delta VC1376$              | $P_{tac-tfoX} \Delta recJ$ 501bp, $\Delta exoVII$ 501bp, $\Delta lacZ::lacIq$ , $\Delta VC1807::Kan^R$ , $\Delta VC1376$                                                                                                                                                                                                          | Replaced ~50bp of the 5' end of $\Delta VC1376$ with a premature stop codon containing sequence in the TND0252 strain background.       | This study (TND0385 / SAD1517) |
| $\Delta VCA0074$             | $P_{tac-tfoX} \Delta recJ$ 501bp, $\Delta exoVII$ 501bp, $\Delta lacZ::lacIq$ , $\Delta VC1807::Kan^R$ , $\Delta VCA0074$                                                                                                                                                                                                         | Replaced ~50bp of the 5' end of $\Delta VCA0074$ with a premature stop codon containing sequence in the TND0252 strain background.      | This study (TND0386 / SAD1518) |
| $\Delta VCA0939$             | $P_{tac-tfoX} \Delta recJ$ 501bp, $\Delta exoVII$ 501bp, $\Delta lacZ::lacIq$ , $\Delta VC1807::Kan^R$ , $\Delta VCA0939$                                                                                                                                                                                                         | Replaced ~50bp of the 5' end of $\Delta VCA0939$ with a premature stop codon containing sequence in the TND0252 strain background.      | This study (TND0387 / SAD1519) |
| $\Delta VCA0697$             | $P_{tac-tfoX} \Delta recJ$ 501bp, $\Delta exoVII$ 501bp, $\Delta lacZ::lacIq$ , $\Delta VC1807::Kan^R$ , $\Delta VCA0697$                                                                                                                                                                                                         | Replaced ~50bp of the 5' end of $\Delta VCA0697$ with a premature stop codon containing sequence in the TND0252 strain background.      | This study (TND0388 / SAD1520) |
| $\Delta VC2285$              | $P_{tac-tfoX} \Delta recJ$ 501bp, $\Delta exoVII$ 501bp, $\Delta lacZ::lacIq$ , $\Delta VC1807::Kan^R$ , $\Delta VC2285$                                                                                                                                                                                                          | Replaced ~50bp of the 5' end of $\Delta VC2285$ with a premature stop codon containing sequence in the TND0252 strain background.       | This study (TND0389 / SAD1521) |
| $\Delta VCA0956$             | $P_{tac-tfoX} \Delta recJ$ 501bp, $\Delta exoVII$ 501bp, $\Delta lacZ::lacIq$ , $\Delta VC1807::Kan^R$ , $\Delta VCA0956$                                                                                                                                                                                                         | Replaced ~50bp of the 5' end of $\Delta VCA0956$ with a premature stop codon containing sequence in the TND0252 strain background.      | This study (TND0390 / SAD1522) |
| $\Delta VC2454$              | $P_{tac-tfoX} \Delta recJ$ 501bp, $\Delta exoVII$ 501bp, $\Delta lacZ::lacIq$ , $\Delta VC1807::Kan^R$ , $\Delta VC2454$                                                                                                                                                                                                          | Replaced ~50bp of the 5' end of $\Delta VC2454$ with a premature stop codon containing sequence in the TND0252 strain background.       | This study (TND0391 / SAD1523) |
| $\Delta VC1216$              | $P_{tac-tfoX} \Delta recJ$ 501bp, $\Delta exoVII$ 501bp, $\Delta lacZ::lacIq$ , $\Delta VC1807::Kan^R$ , $\Delta VC1216$                                                                                                                                                                                                          | Replaced ~50bp of the 5' end of $\Delta VC1216$ with a premature stop codon containing sequence in the TND0252 strain background.       | This study (TND0392 / SAD1524) |
| $\Delta VC1067$              | $P_{tac-tfoX} \Delta recJ$ 501bp, $\Delta exoVII$ 501bp, $\Delta lacZ::lacIq$ , $\Delta VC1807::Kan^R$ , $\Delta VC1067$                                                                                                                                                                                                          | Replaced ~50bp of the 5' end of $\Delta VC1067$ with a premature stop codon containing sequence in the TND0252 strain background.       | This study (TND0393 / SAD1525) |
| $\Delta VC1599$              | $P_{tac-tfoX} \Delta recJ$ 501bp, $\Delta exoVII$ 501bp, $\Delta lacZ::lacIq$ , $\Delta VC1807::Kan^R$ , $\Delta VC1599$                                                                                                                                                                                                          | Replaced ~50bp of the 5' end of $\Delta VC1599$ with a premature stop codon containing sequence in the TND0252 strain background.       | This study (TND0394 / SAD1526) |
| $\Delta 12$ DGC "unrepaired" | $\Delta VCA0956$ , $\Delta VC1599$ , $\Delta VC2454$ , $\Delta VC1104$ , $\Delta VCA0939$ , $\Delta VCA0074$ , $\Delta VC2224$ , $\Delta VC1376$ , $\Delta VC1067$ , $\Delta VC1216$ , $\Delta VCA0697$ , $\Delta VC2285$ , $P_{tac-tfoX} \Delta recJ$ 501bp, $\Delta exoVII$ 501bp, $\Delta lacZ::lacIq$ , $\Delta VC1807::Tm^R$ | Replaced ~50bp of the 5' end of all 12 DGCs indicated with a premature stop codon containing sequence in the TND0252 strain background. | This study (TND0349 / SAD1527) |

|                                                                       |                                                                                                                                                                      |                                                                                                                                                                                                |                                |
|-----------------------------------------------------------------------|----------------------------------------------------------------------------------------------------------------------------------------------------------------------|------------------------------------------------------------------------------------------------------------------------------------------------------------------------------------------------|--------------------------------|
| Δ12 DGC “repaired”                                                    | ΔVCA0956, ΔVC1599, ΔVC2454, ΔVC1104, ΔVCA0939, ΔVCA0074, ΔVC2224, ΔVC1376, ΔVC1067, ΔVC1216, ΔVCA0697, ΔVC2285, ΔVC1807::Spec <sup>R</sup>                           | Repaired the <i>P<sub>tac</sub>-tfoX</i> , <i>ΔrecJ</i> , <i>ΔexoVII</i> , and <i>ΔlacZ::lacIq</i> mutations in TND0349.                                                                       | This study (TND0354 / SAD1528) |
| Δ10xSBS parent strain background                                      | Δ10xSBS, <i>P<sub>tac</sub>-tfoX ΔrecJ</i> 501bp, <i>ΔexoVII</i> 501bp, <i>ΔlacZ::lacIq</i> , ΔVC1807::Spec <sup>R</sup>                                             | Mutated conserved residues in the 10 highest-affinity SBSs in the TND0252 strain background.                                                                                                   | This study (TND0291 / SAD1529) |
| Δ10xSBS parent strain background “repaired”                           | Δ10xSBS, ΔVC1807::Spec <sup>R</sup>                                                                                                                                  | Repaired the <i>P<sub>tac</sub>-tfoX</i> , <i>ΔrecJ</i> , <i>ΔexoVII</i> , and <i>ΔlacZ::lacIq</i> mutations in TND0291.                                                                       | This study (TND0311 / SAD1530) |
| Δ10xSBS <i>P<sub>tac</sub>-mutL E32K</i> strain background            | Δ10xSBS, <i>P<sub>tac</sub>-tfoX ΔrecJ</i> 501bp, <i>ΔexoVII</i> 501bp, ΔVC1807::P <sub>tac</sub> -mutL E32K Spec <sup>R</sup> , ΔVCA0692::Carb <sup>R</sup>         | Mutated conserved residues in the 10 highest-affinity SBSs in the SAD1308 strain background.                                                                                                   | This study (TND0273 / SAD1531) |
| Δ10xSBS <i>P<sub>tac</sub>-mutL E32K</i> strain background “repaired” | Δ10xSBS, ΔVC1807::Kan <sup>R</sup>                                                                                                                                   | Repaired the <i>P<sub>tac</sub>-tfoX</i> , <i>ΔrecJ</i> , <i>ΔexoVII</i> , ΔVC1807::P <sub>tac</sub> -mutL E32K, and ΔVCA0692 mutations in TND0273.                                            | This study (TND0313 / SAD1532) |
| ΔcdgJ                                                                 | ΔcdgJ::Kan <sup>R</sup>                                                                                                                                              | Introduced a cdgJ mutation into the WT (SAD030) strain background.                                                                                                                             | This study (TND0411 / SAD1533) |
| Δ12 DGC ΔcdgJ                                                         | ΔVCA0956, ΔVC1599, ΔVC2454, ΔVC1104, ΔVCA0939, ΔVCA0074, ΔVC2224, ΔVC1376, ΔVC1067, ΔVC1216, ΔVCA0697, ΔVC2285, ΔVC1807::Spec <sup>R</sup> , ΔcdgJ::Kan <sup>R</sup> | Introduced a cdgJ mutation into the TND0354 strain background.                                                                                                                                 | This study (TND0412 / SAD1534) |
| WT <i>ftsZ</i> -RFPT                                                  | <i>ΔlacZ::(P<sub>bad</sub>::ftsZ-RFPT-zeo)</i>                                                                                                                       | Introduced a <i>P<sub>bad</sub>::ftsZ-RFPT-zeo</i> in place of the chromosomal copy of <i>lacZ</i> into the WT (SAD030) strain background                                                      | This study                     |
| Δ <i>slmA</i> <i>ftsZ</i> -RFPT                                       | Δ <i>slmA</i> ::Kan <sup>R</sup> , <i>ΔlacZ::(P<sub>bad</sub>::ftsZ-RFPT-zeo)</i>                                                                                    | Introduced a <i>P<sub>bad</sub>::ftsZ-RFPT-zeo</i> in place of the chromosomal copy of <i>lacZ</i> in a Δ <i>slmA</i> mutant strain background                                                 | This study                     |
| Δ10xSBS <i>ftsZ</i> -RFPT                                             | ΔVC1807::Kan <sup>R</sup> , Δ10xSBS, <i>ΔlacZ::(P<sub>bad</sub>::ftsZ-RFPT-zeo)</i>                                                                                  | Introduced a <i>P<sub>bad</sub>::ftsZ-RFPT-zeo</i> in place of the chromosomal copy of <i>lacZ</i> into TND0313                                                                                | This study                     |
| WT pMLH17                                                             | pMLH17                                                                                                                                                               | WT strain (SAD030) with pMLH17 (Hsieh <i>et al.</i> unpublished), an Amp <sup>R</sup> arabinose-inducible vector for ectopic expression of <i>vpsR</i> . This vector is derived from pHERD20T. | This study                     |
| Δ12 DGC pMLH17                                                        | ΔVCA0956, ΔVC1599, ΔVC2454, ΔVC1104, ΔVCA0939, ΔVCA0074, ΔVC2224, ΔVC1376, ΔVC1067, ΔVC1216, ΔVCA0697, ΔVC2285, ΔVC1807::Spec <sup>R</sup> , pMLH17                  | TND0354 with pMLH17 (Hsieh <i>et al.</i> unpublished), an Amp <sup>R</sup> arabinose-inducible vector for ectopic expression of <i>vpsR</i> . This vector is derived from pHERD20T.            | This study                     |
| <b><i>A. baylyi</i> strains</b>                                       |                                                                                                                                                                      |                                                                                                                                                                                                |                                |
| WT                                                                    | Strain ADP1                                                                                                                                                          | Wildtype <i>A. baylyi</i> strain used throughout this study                                                                                                                                    | (4) / SAD631                   |

|                             |                                                           |                                                                                         |                                |
|-----------------------------|-----------------------------------------------------------|-----------------------------------------------------------------------------------------|--------------------------------|
| $\Delta$ RecJ               | $\Delta$ recJ::Kan <sup>R</sup> (i.e. $\Delta$ ACIAD3500) | Introduced $\Delta$ recJ::Kan <sup>R</sup> mutation into the wildtype strain background | This study (TND0166 / SAD1535) |
| $\Delta$ ExoX               | $\Delta$ exoX (i.e. $\Delta$ ACIAD2257)                   | Introduced an in-frame $\Delta$ exoX mutation into the wildtype strain background       | This study (TND0185 / SAD1536) |
| $\Delta$ RecJ $\Delta$ ExoX | $\Delta$ recJ::Kan <sup>R</sup> , $\Delta$ exoX           | Introduced an in-frame $\Delta$ exoX mutation into the TND0166 strain background        | This study (TND0194 / SAD1537) |

**Table S3 – Primers used in this study**

| Primer Name                          | Primer Sequence (5'→3')*                           | Description                 |
|--------------------------------------|----------------------------------------------------|-----------------------------|
| <b>Primers for Mutant constructs</b> |                                                    |                             |
| BBC688                               | TGGATGAGTGCTAAATGATGC                              | $\Delta$ exol Vc F1         |
| BBC689                               | gtcgacggatccccggaatCATGTGGCTTACCAAATCGC            | $\Delta$ exol Vc R1         |
| BBC690                               | gaagcagctccagcctacaTGCTAACATCGTTTATTTTACTTGC       | $\Delta$ exol Vc F2         |
| BBC691                               | AACATGGTAAACAGCACCATC                              | $\Delta$ exol Vc R2         |
| BBC678                               | TGGATGCCAATCAACATTCCG                              | $\Delta$ recJ Vc F1         |
| BBC679                               | gtcgacggatccccggaatCATACTGTGACAGGCCAAAAG           | $\Delta$ recJ Vc R1         |
| BBC680                               | gaagcagctccagcctacaGAAGCGAAATGATTGAAAACAACG        | $\Delta$ recJ Vc F2         |
| BBC681                               | GATCGCATCCACAATGTTAGC                              | $\Delta$ recJ Vc R2         |
| DOG0190                              | AGAAGAACTCTGTTTTGCATTAGAAC                         | $\Delta$ exoIX Vc F1        |
| DOG0191                              | gtcgacggatccccggaatCAAGCGACGAGTTCATGCTTG           | $\Delta$ exoIX Vc R1        |
| DOG0192                              | gaagcagctccagcctacaTAAATCCCCCTGATTAGCATC           | $\Delta$ exoIX Vc F2        |
| DOG0193                              | TTAACCTGACGTGACCGTG                                | $\Delta$ exoIX Vc R2        |
| DOG0185                              | TTCACTTCACCCAGTACACGC                              | $\Delta$ exoVII Vc F1       |
| DOG0186                              | gtcgacggatccccggaatCAACGCTGATTCTCAGACG             | $\Delta$ exoVII Vc R1       |
| DOG0187                              | gaagcagctccagcctacaTTAATGGATGGTGAGATTCTCTC         | $\Delta$ exoVII Vc F2       |
| DOG0188                              | AGTTTGTAGAGGTTGTTATGGTAC                           | $\Delta$ exoVII Vc R2       |
| DOG0219                              | ATAGATGGTGCCTTGCGC                                 | $\Delta$ exoVII 501bp Vc F1 |
| DOG0220                              | gctaattcagtttaagcgccatCAACGCTGATTCTCAGACG          | $\Delta$ exoVII 501bp Vc R1 |
| DOG0221                              | atggccgcttaactgaattagcCTGCCTGTAGTGATCTACCCC        | $\Delta$ exoVII 501bp Vc F2 |
| DOG0222                              | AAGTTCTCGGTAGTCAAAACC                              | $\Delta$ exoVII 501bp Vc R2 |
| BBC1342                              | ATACGTTCCAGGCACTGTTTGG                             | $\Delta$ recJ 501bp Vc F1   |
| BBC1343                              | GCTAATTCAGTTTAAAGCGGCCATCATGCTTGAAAAGAGCCAGC       | $\Delta$ recJ 501bp Vc R1   |
| BBC1344                              | ATGGCCGCTTAAACTGAATTAGCGTGGATGCTATGGTCAACCC        | $\Delta$ recJ 501bp Vc F2   |
| BBC1345                              | TTACGAATCGCAGACACTAGC                              | $\Delta$ recJ 501bp Vc R2   |
| ABD824                               | TTTAGCCCCATTGGCGAACTGGG                            | $\Delta$ mutS 501bp Vc F1   |
| ABD825                               | GAGTATCTTTGACGTATTGGATCtcatattatactaCATAATCTTATGTC | $\Delta$ mutS 501bp Vc R1   |
| ABD826                               | GATAAGCAGCGACATAAGATTATGtagtataatgaGATCCAA TACGTC  | $\Delta$ mutS 501bp Vc F2   |
| ABD360                               | AGATCTTGCCTGATGACGCTTTACTC                         | $\Delta$ mutS 501bp Vc R2   |
| BBC717                               | AAATAGATTTGGTGACTTTACCTCC                          | $\Delta$ VC1807 Vc F1       |
| ABD340                               | gtcgacggatccccggaatACGTTTCATTAGTCACCTCTATTGTTAACTT | $\Delta$ VC1807 Vc R1       |
| ABD341                               | gaagcagctccagcctacaTAGTCGAAAATAAAAAAAGAGGCTCGCCTC  | $\Delta$ VC1807 Vc F2       |

|         |                                                                                                       |                                                                                 |
|---------|-------------------------------------------------------------------------------------------------------|---------------------------------------------------------------------------------|
| BBC718  | CTTTACGCCTGATTGTCTACAC                                                                                | $\Delta$ VC1807 Vc R2                                                           |
| BBC1249 | CCAGCATCTAAACTGTTcTtCACCAACTCCTTGACTAC                                                                | <i>mutL</i> E32K R1                                                             |
| BBC1250 | GTAGTCAAGGAGTTGGTgAgAACAGTTTAGATGCTGG                                                                 | <i>mutL</i> E32K F2                                                             |
| BBC791  | caatttcacacaggatcccgggAGGAGGTaacgtaATGACGATTCGA<br>ATC                                                | MIDDLE for $P_{tac}$ - <i>mutL</i> E32K F                                       |
| BBC792  | gttagtgaggagctgcttcTCATGAGTGTAATGCTGTAATTG                                                            | MIDDLE for $P_{tac}$ - <i>mutL</i> E32K R                                       |
| ABD342  | ATTTTTTCAGTTGGCCTACAATGCTTTCC                                                                         | UP for $\Delta$ VC1807:: $P_{tac}$ - <i>mutL</i> Spec <sup>R</sup><br>E32K F1   |
| BBC244  | CCCCGGATCCTGTGTGAAATTGTTATCCGC                                                                        | UP for $\Delta$ VC1807:: $P_{tac}$ - <i>mutL</i> E32K<br>Spec <sup>R</sup> R1   |
| ABD341  | gaagcagctccagcctacaTAGTCGAAAATAAAAAAAGAGGCTC<br>GCCTC                                                 | DOWN for $\Delta$ VC1807:: $P_{tac}$ - <i>mutL</i> Spec <sup>R</sup><br>E32K F2 |
| ABD345  | CTTGCTAACCGTTGGTGTTACCAGC                                                                             | DOWN for $\Delta$ VC1807:: $P_{tac}$ - <i>mutL</i> Spec <sup>R</sup><br>E32K R2 |
| DOG0209 | TAGTGGTGGATGACCTTCATG                                                                                 | $\Delta$ recJ Ab F1                                                             |
| DOG0210 | gtcgacggatccccggaatCATTTATGGCATCAGTCGTTGC                                                             | $\Delta$ recJ Ab R1                                                             |
| DOG0211 | gaagcagctccagcctacaTAAAAAATCGCTCATTTGAGCG                                                             | $\Delta$ recJ Ab F2                                                             |
| DOG0212 | AATCAGACCTGCACCAGCTC                                                                                  | $\Delta$ recJ Ab R2                                                             |
| DOG0231 | TCAGCCTGCTCTTAATACGC                                                                                  | $\Delta$ exoX Ab F1                                                             |
| DOG0232 | gtcgacggatccccggaatCAATCTGATTTTCTTTGCTTACATTG                                                         | $\Delta$ exoX Ab R1                                                             |
| DOG0233 | gaagcagctccagcctacaTAAAATATAGCTCTCACTGACTATTT<br>C                                                    | $\Delta$ exoX Ab F2                                                             |
| DOG0234 | ATCATGTTGTTGCTTTGCATCG                                                                                | $\Delta$ exoX Ab R2                                                             |
| BBC1388 | ATGCCGATCATATCGGTcAGTGTGTACACACTCCTGTTCCc<br>AatCTatacAcagAAGCATTtATTCTCGTTGGTGAC                     | SBS29 edit F                                                                    |
| BBC1389 | GCTACGAGTAGAAATCATCGC                                                                                 | SBS29 edit R                                                                    |
| BBC1383 | AAGCCGATAAGAATGAGCGGTTAGCAGGCAAAACCATTGG<br>cGAGCAtcTttTgGCACCGACCAAAATTTATATCAA                      | SBS17 edit F                                                                    |
| BBC1384 | CTAGCATGGTGAAAGTCAGTG                                                                                 | SBS17 edit R                                                                    |
| BBC1393 | GTGATTCAACTCGAAAACGGGTACGGTTTAGCTAGGTTTa<br>aTctgTTTTtagTtagTATTGGCCCTTGTGATAATGG                     | SBS49 edit F                                                                    |
| BBC1384 | CTAGCATGGTGAAAGTCAGTG                                                                                 | SBS49 edit R                                                                    |
| BBC1408 | TTAGGCGCAAGGTCACTTTACCGCTTCAGGCAAGCGGTTc<br>GTtGGaACCCAtTCCTTACTCCATTACCTTGC                          | SBS5 edit F                                                                     |
| BBC1409 | CAAGGTTTTGCGTTTAAAGCG                                                                                 | SBS5 edit R                                                                     |
| BBC1398 | CTGCAGGCAGTATGATCGCCGATCAAGATCAGGAACGTTTa<br>cTgGcTtTAACgAACCAACTCGCGACCGATC                          | SBS15 edit F                                                                    |
| BBC1399 | AAACTACGACAAGTATCTTGCG                                                                                | SBS15 edit R                                                                    |
| BBC1412 | TATTGGATTGGGGATCGTTATCAAAGACAAGGCTATGGTA<br>AaGAAGCtTgACgGCGCTGATTTTATTCTGTTTTGAG                     | SBS23 edit F                                                                    |
| BBC1413 | ACTATCTTGGTCGAGTTGACC                                                                                 | SBS23 edit R                                                                    |
| BBC1403 | CAGATAATGTGGTTTTGACTCTTTGTTTCGAGGTTACCGTgt<br>caAAAaGacTctTgAAGTCTGGCATCATTGTAAGTG                    | SBS46 edit F                                                                    |
| BBC1404 | TCTCTACCATCAATTCGATCGG                                                                                | SBS46 edit R                                                                    |
| BBC1378 | AATCGCCCGACACATCGCGCAGCGAACCATGATCAATAAAa<br>TTcGcGaaACaAgCAAAGAGTTGATGTTGATGCC                       | SBS56 edit F                                                                    |
| BBC1379 | CTGTTGTTACTGGGTATTGGC                                                                                 | SBS56 edit R                                                                    |
| BBC1373 | TCCATGCGGAAACCGATAGTGAGCGAGATAGCGCATTACGc<br>GAGCAtcTttTgGCGCTTCGTAACCATATTCCG                        | SBS2 edit F                                                                     |
| BBC1374 | GAAGTTTTCGGCCAGATAGCG                                                                                 | SBS2 edit R                                                                     |
| BBC1084 | CAAGTAGGCGCGTAAGTTGGCGGTTTGGCTGCCACTCATCAC<br>CCGGCATTtTTGTACATAAagactcttTtCCATACACCACTTCA<br>TCGTGTG | SBS66 edit F                                                                    |

|                             |                                                                                              |                                                                 |
|-----------------------------|----------------------------------------------------------------------------------------------|-----------------------------------------------------------------|
| BBC1085                     | AAAGTGGGTAGCCAGAATTCC                                                                        | SBS66 edit R                                                    |
| DOG0300                     | CGCAGCAAAAAATACAACATACCATTATTCAACGTCTATGg<br>ccgcttaactgaattagcTTGATTTCCACCAGCAGTTTAGC       | VC1067 edit F                                                   |
| DOG0301                     | TTATCCCTTCCCAACTAAGCAGC                                                                      | VC1067 edit R                                                   |
| DOG0304                     | CGTGAGTTAGCGGTATAGGCTAAAGAGTTGAGCGCCGAGC<br>ATGgcccgttaactgaattagcGATGAGCAGCATCAATCTCTC      | VC1216 edit F                                                   |
| DOG0305                     | TTTGTGAGCATCTGGATGTTGAG                                                                      | VC1216 edit R                                                   |
| DOG0308                     | AAGGTTATGAAAAATGTCTTGGCGTATCCGAAACAAGTGATG<br>gcccgttaactgaattagcCCTTTAATGATGAAACATCATGTCCG  | VCA0956 edit F                                                  |
| DOG0309                     | ATCATTCACTTTACGCATATTTCC                                                                     | VCA0956 edit R                                                  |
| DOG0312                     | TTCTATAGTATGCACTCAACGACTTATACATCGAATTATGg<br>ccgcttaactgaattagcGTACTTGGTTTTATTCTTACACTG      | VCA0697 edit F                                                  |
| DOG0313                     | AACAAATCCATATTGGCATCATAG                                                                     | VCA0697 edit R                                                  |
| DOG0316                     | ATAAACGCTTACGTTTAGCCCCGAGAGGGTGAGTGCATGg<br>ccgcttaactgaattagcTGCGGCCTAAGTTTCTTTTG           | VC1599 edit F                                                   |
| DOG0317                     | TTAGTGAGCTGATCGATGCC                                                                         | VC1599 edit R                                                   |
| DOG0320                     | TTTGTCTAAGTAAAGGTTTATTATGACGATGGTGATATG<br>gcccgttaactgaattagcGCGGTGGTGTAGGCTTTTAAATG        | VC2285 edit F                                                   |
| DOG0321                     | AATCACTGTCGCCACTAAAAC                                                                        | VC2285 edit R                                                   |
| DOG0324                     | TAACGATTGGCTAGGTTCCCAAGCCGAAGCAACCGATGg<br>ccgcttaactgaattagcAATAGAATTGAAGAGCTTTTTGATAA<br>C | VCA0939 edit F                                                  |
| DOG0325                     | AAACGGTTGCCAGTATAAGC                                                                         | VCA0939 edit R                                                  |
| DOG0328                     | TCACCGAGAGTTAATGGCAACATAGCCAGTACTCGGTATGg<br>ccgcttaactgaattagcATGCGCTTCTGTTTTCCACTG         | VC2224 edit F                                                   |
| DOG0329                     | TTCAAGCACGCTTAGACTTAC                                                                        | VC2224 edit R                                                   |
| DOG0332                     | TGGTGGGTTTTTCATTTCTAGAGGTTAGCAGGCAATTATGg<br>ccgcttaactgaattagcGTTTTGTGCTGGCCGCAT            | VC1104 edit F                                                   |
| DOG0333                     | AACATACGAATCGAGCCATC                                                                         | VC1104 edit R                                                   |
| DOG0336                     | GATATTGATATATCACACATCTTCATCATGATTTTTTCATGg<br>ccgcttaactgaattagcATTGTGCCCTTGCTGGTAC          | VC1376 edit F                                                   |
| DOG0337                     | AATTTTAGGTAATGCTTGAAGAG                                                                      | VC1376 edit R                                                   |
| DOG0340                     | CCCCTGATCTTACATGCCAAAACACTGCTGATCTTCATGg<br>ccgcttaactgaattagcGATTTATCTAAGTCTTACTCTTCGC      | VCA0074 edit F                                                  |
| DOG0341                     | TTATCTTGGGTATTGGTCGC                                                                         | VCA0074 edit R                                                  |
| DOG0344                     | AACGCGAACTTCGCCACTGGTTAATCGCTTGCTGAAGATGg<br>ccgcttaactgaattagcATTCCGCGCGGCATACAG            | VC2454 edit F                                                   |
| DOG0345                     | AACCTTCTCACCATCATCAATG                                                                       | VC2454 edit R                                                   |
| BBC1672                     | GATCAATTCTTTGGCTCGAG                                                                         | $\Delta$ cdgJ F1                                                |
| BBC1673                     | gtcgacggatccccggaatCATGGTGTCTCAAAGGGTTG                                                      | $\Delta$ cdgJ R1                                                |
| BBC1674                     | gaagcagctccagcctacaCGATTAATTTAGTGATAAGTTAATGC<br>ACC                                         | $\Delta$ cdgJ F2                                                |
| BBC1675                     | CATACTCCCCGACAATTGCAC                                                                        | $\Delta$ cdgJ R2                                                |
| <b>Primers for MASC-PCR</b> |                                                                                              |                                                                 |
| ABD725                      | GAAGCAGCTCCAGCCTACA                                                                          | F oligo to detect all resistance cassette or in-frame mutations |
| ABD969                      | ATGGCCGCTTAAACTGAATTAGC                                                                      | F oligo to detect all 501 bp or 50 bp mutations                 |
| BBC692                      | GAACAGCAAAATCATGTAACG                                                                        | R to detect <i>exoI</i> mutation in Vc                          |
| BBC682                      | AAGAGTTGAAACAATATATGGAATGG                                                                   | R to detect <i>recJ</i> mutation in Vc                          |
| DOG0194                     | TTCCGCGATTGGATGCTG                                                                           | R to detect <i>exoIX</i> mutation in Vc                         |
| DOG0189                     | TCGATGAATTATGTGATACAACGC                                                                     | R to detect <i>exoVII</i> mutation in Vc                        |
| DOG0223                     | AGGATGCTGTTTATCAAGCTTGTG                                                                     | R to detect <i>exoVII</i> 501bp mutation in                     |



|         |                          |                                                 |
|---------|--------------------------|-------------------------------------------------|
|         |                          | Vc                                              |
| BBC1346 | CAGTTCCATCAGTTTAGGC      | R to detect <i>recJ</i> 501bp mutation in Vc    |
| ABD848  | AGGGTATCAATGCCGTGACG     | R to detect <i>mutS</i> 501bp mutation in Vc    |
| BBC030  | ACCAAACAATAAACGAGTAATGC  | R to detect VC1807 mutation in Vc               |
| BBC1251 | AGTCAAGGAGTTGGTGagg      | F to detect <i>mutL</i> E32K                    |
| BBC1252 | GGTTAAGCGTGAGACTGAGC     | R to detect <i>mutL</i> E32K                    |
| BBC1150 | GCACTTGGTTTACAAGGTTATGAC | R to detect $\Delta$ <i>recJ</i> mutation in Ab |
| DOG0235 | AAGCATCTGGTAAAGTCAATAAG  | R to detect $\Delta$ <i>exoX</i> mutation in Ab |
| BBC1676 | TTTAACGCTGAGCGCTCGAC     | R to detect $\Delta$ <i>cdgJ</i> mutation       |
| BBC1390 | CTGTTCCcAatCTatacAcag    | Detect SBS29 edited F                           |
| BBC1391 | AACAGCGGTATTTTTATTGCG    | Detect SBS29 R                                  |
| BBC1385 | CCATTGGcGAGCAtcctt       | Detect SBS17 edited F                           |
| BBC1386 | GATTTGCGCCGATGACCCATG    | Detect SBS17 R                                  |
| BBC1395 | CTAGGTTTaaTctgGTTtagTtag | Detect SBS49 edited F                           |
| BBC1396 | AGTGAATAAAGCAATCCGCAAG   | Detect SBS49 R                                  |
| BBC1411 | CGCTGTTTAGCCCGCATTTTC    | Detect SBS5 edited F                            |
| BBC1410 | AAGGAaTGGGTtCCaAtg       | Detect SBS5 R                                   |
| BBC1400 | AGGAACGTTTAcTgGttt       | Detect SBS15 edited F                           |
| BBC1401 | GAAGTGTCTACACGCCAG       | Detect SBS15 R                                  |
| BBC1414 | GGCTATGGTAAaGAAGttt      | Detect SBS23 edited F                           |
| BBC1415 | CCTAATGGGTAACCTAACCTCGTG | Detect SBS23 R                                  |
| BBC1405 | ACCGTGtcaAAAaGaccct      | Detect SBS46 edited F                           |
| BBC1406 | GACCGGGACAAATGCTTGAG     | Detect SBS46 R                                  |
| BBC1380 | ATGATCAATAAAaTTcGCgaa    | Detect SBS56 edited F                           |
| BBC1381 | CTCGATGATCTCTTACTGCG     | Detect SBS56 R                                  |
| BBC1375 | CATTACGcGAGCAtcctt       | Detect SBS2 edited F                            |
| BBC1376 | GTCGGCTTGAATCGCGAC       | Detect SBS2 R                                   |
| BBC1086 | GGCATTTTGTACATAAGacttctt | Detect SBS66 edited F                           |
| BBC1087 | AATGTTGACGGTGGACGCG      | Detect SBS66 R                                  |
| DOG0302 | TGACGTATTCAATTTCAAGGTTG  | Detect VC1067 edit R                            |
| DOG0306 | ATGAAGTGCTGAAATGCCG      | Detect VC1216 edit R                            |
| DOG0310 | CAAAGGAACTGGTGTCACTG     | Detect VCA0956 edit R                           |
| DOG0314 | ATTGAGCCACAATTTGCTGG     | Detect VCA0697 edit R                           |
| DOG0318 | AGAGTGAGGTTTGATCACTAAACC | Detect VC1599 edit R                            |
| DOG0322 | TTTCTTCGGTTCGAATGAAGGG   | Detect VC2285 edit R                            |
| DOG0326 | AGAGTCAGAGGGTTAGCATAG    | Detect VCA0939 edit R                           |
| DOG0330 | TGTAGTGGTAGTAATGACCGG    | Detect VC2224 edit R                            |
| DOG0334 | TGATCACTGAGCGATAAGGCC    | Detect VC1104 edit R                            |
| DOG0338 | GCATATCGAGATCTTGTTCCATG  | Detect VC1376 edit R                            |
| DOG0342 | CAAGCAGTAGCGGTTCAAG      | Detect VCA0074 edit R                           |
| DOG0346 | ACGCTGGCTAACTTAACCG      | Detect VC2454 edit R                            |

## SUPPLEMENTARY REFERENCES

1. Liu, X., Beyhan, S., Lim, B., Linington, R.G. and Yildiz, F.H. (2010) Identification and characterization of a phosphodiesterase that inversely regulates motility and biofilm formation in *Vibrio cholerae*. *J Bacteriol*, **192**, 4541-4552.
2. Townsley, L. and Yildiz, F.H. (2015) Temperature affects c-di-GMP signalling and biofilm formation in *Vibrio cholerae*. *Environ Microbiol*, **17**, 4290-4305.
3. Miller, V.L., DiRita, V.J. and Mekalanos, J.J. (1989) Identification of *toxS*, a regulatory gene whose product enhances *toxR*-mediated activation of the cholera toxin promoter. *J Bacteriol*, **171**, 1288-1293.
4. Juni, E. and Janik, A. (1969) Transformation of *Acinetobacter calco-aceticus* (*Bacterium anitratum*). *J Bacteriol*, **98**, 281-288.
